# Supplementary material for: Urinary Biomarkers of Exposure to Volatile Organic Compounds from the Population Assessment of Tobacco and Health Study Wave 1 (2013–2014)
Source: PubMed Central journal article supplement (PMC7432690; doi:10.3390/ijerph17155408), 2020-07-28
Supplement: ijerph-17-05408-s001.pdf [file ijerph-17-05408-s001.pdf]

Table S1. Sample-weighted detection frequencies (percent) for 20 VOCM by tobacco user group.

| Analyte | Every Day Established<br>Exclusive Combustible<br>Users | Every Day Established<br>Exclusive E-Cigarette<br>Users | Every Day<br>Established Exclusive<br>Smokeless Users | Never Users | All          |
|---------|---------------------------------------------------------|---------------------------------------------------------|-------------------------------------------------------|-------------|--------------|
|         | [N = 3,156]                                             | [N = 149]                                               | [N = 353]                                             | [N = 1,563] | [N = 11,501] |
| 2MHA    | 99.7                                                    | 90.5                                                    | 94.0                                                  | 91.5        | 94.6         |
| 34MH    | 99.9                                                    | 99.7                                                    | 100                                                   | 99.8        | 99.8         |
| 2CAEMA  | 100                                                     | 100                                                     | 100                                                   | 99.8        | 99.8         |
| MCAMA   | 99.9                                                    | 100                                                     | 100                                                   | 99.8        | 99.7         |
| BZMA    | 99.6                                                    | 100                                                     | 99.6                                                  | 99.5        | 99.5         |
| 2COEMA  | 100                                                     | 100                                                     | 99.4                                                  | 99.5        | 99.6         |
| 1CYHEMA | 95.4                                                    | 15.6                                                    | 4.67                                                  | 2.83        | 36.0         |
| 2CYEMA  | 99.8                                                    | 93.4                                                    | 85.4                                                  | 84.6        | 91.2         |
| 34HBMA  | 100                                                     | 100                                                     | 100                                                   | 99.8        | 99.9         |
| 2CAHEMA | 76.5                                                    | 42.0                                                    | 38.0                                                  | 37.5        | 51.6         |
| 2HEMA   | 88.5                                                    | 45.6                                                    | 47.1                                                  | 52.7        | 63.7         |
| 2HPMA   | 99.6                                                    | 93.5                                                    | 96.1                                                  | 97.2        | 97.7         |
| 3HPMA   | 100                                                     | 100                                                     | 100                                                   | 99.6        | 99.8         |
| 3HMPMA  | 100                                                     | 98.8                                                    | 100                                                   | 99.9        | 99.9         |
| 4HMBEMA | 99.6                                                    | 81.5                                                    | 87.9                                                  | 90.2        | 93.5         |
| MADA    | 99.9                                                    | 96.6                                                    | 98.6                                                  | 99.1        | 99.1         |
| t4HBEMA | 99.9                                                    | 97.9                                                    | 99.3                                                  | 98.8        | 98.9         |
| PHGA    | 99.9                                                    | 100                                                     | 100                                                   | 99.7        | 99.7         |
| PHMA    | 68.5                                                    | 59.9                                                    | 65.7                                                  | 68.3        | 67.4         |
| TTCA    | 74.1                                                    | 62.4                                                    | 65.7                                                  | 69.0        | 70.9         |

Table S2. Sample-weighted geometric means [standard error] by demographic and tobacco user group for PATH Study Wave 1 (2013-2014): 2-Methylhippuric acid (2MHA).

| 2MHA      |                                  | Every Day Established Combustible Users |                           | Every Day Established E-Cigarette Users |                           | Every Day Established Smokeless Users |                           | Never Users                    |                           |
|-----------|----------------------------------|-----------------------------------------|---------------------------|-----------------------------------------|---------------------------|---------------------------------------|---------------------------|--------------------------------|---------------------------|
| Predictor | Level                            | Non-Creatinine Ratioed [ng/mL]          | Creatinine Ratioed [µg/g] | Non-Creatinine Ratioed [ng/mL]          | Creatinine Ratioed [µg/g] | Non-Creatinine Ratioed [ng/mL]        | Creatinine Ratioed [µg/g] | Non-Creatinine Ratioed [ng/mL] | Creatinine Ratioed [µg/g] |
| All       | All                              | 113 [2.87]                              | 116 [2.78]                | 28.1 [2.53]                             | 32.1 [2.42]               | 35.2 [2.74]                           | 34.2 [2.63]               | 23.4 [0.906]                   | 22.2 [0.857]              |
| Age       | 18 – 24                          | 87.6 [7.78]                             | 73.8 [6.10]               | 27.5 [8.24]†                            | 32.8 [6.98]†              | 41.4 [9.14]                           | 29.3 [5.12]               | 23.4 [1.27]                    | 17.9 [0.991]              |
|           | 25 – 34                          | 123 [4.89]                              | 104 [4.41]                | 31.1 [5.29]†                            | 29.4 [4.67]†              | 45.1 [7.00]                           | 36.0 [6.86]               | 26.3 [2.51]                    | 21.5 [1.57]               |
|           | 35 – 54                          | 118 [4.49]                              | 122 [4.97]                | 32.1 [4.10]                             | 34.7 [3.91]               | 34.7 [4.12]                           | 33.0 [3.57]               | 25.5 [1.64]                    | 24.5 [1.92]               |
|           | ≥55                              | 111 [5.78]                              | 141 [6.11]                | 19.9 [5.22]†                            | 31.7 [7.42]†              | 29.1 [4.64]                           | 37.1 [5.08]               | 19.9 [1.68]                    | 22.2 [1.81]               |
| Sex       | Male                             | 121 [4.18]                              | 105 [3.18]                | 34.0 [4.16]                             | 30.0 [3.35]               | 36.4 [2.88]                           | 35.1 [2.86]               | 25.0 [1.91]                    | 20.6 [1.46]               |
|           | Female                           | 106 [3.81]                              | 129 [4.43]                | 24.6 [3.34]                             | 33.7 [4.08]               | 17.0 [7.20]†                          | 20.5 [10.1]†              | 22.5 [0.980]                   | 23.2 [1.04]               |
| Race      | Non-Hispanic White               | 120 [3.59]                              | 137 [3.79]                | 28.0 [2.88]                             | 34.2 [2.75]               | 34.6 [3.02]                           | 34.1 [3.03]               | 25.3 [1.43]                    | 25.6 [1.43]               |
|           | Non-Hispanic Black               | 111 [7.76]                              | 78.1 [4.56]               | 53.6 [22.5]†                            | 27.0 [10.2]†              | 20.8 [4.61]†                          | 15.6 [1.96]†              | 21.7 [1.89]                    | 16.7 [1.65]               |
|           | Hispanic                         | 86.3 [5.86]                             | 75.9 [4.74]               | 26.6 [7.09]†                            | 26.7 [11.4]†              | 47.4 [18.3]†                          | 54.8 [17.0]†              | 22.6 [1.52]                    | 20.3 [1.34]               |
|           | Other Race/Multiracial Ethnicity | 88.2 [9.44]                             | 96.7 [9.36]               | 10.7 [6.03]†                            | 11.5 [6.90]†              | 62.4 [18.2]†                          | 52.1 [13.2]†              | 17.5 [2.27]                    | 16.4 [2.59]               |
| Education | <High School/GED                 | 115 [4.47]                              | 119 [4.39]                | 28.7 [8.00]†                            | 29.9 [8.18]†              | 31.8 [4.64]                           | 33.8 [4.29]               | 22.0 [1.88]                    | 20.3 [1.63]               |
|           | HS Diploma                       | 122 [5.68]                              | 124 [5.77]                | 34.3 [6.12]†                            | 33.2 [5.35]†              | 40.9 [6.24]                           | 40.1 [6.50]               | 28.3 [2.58]                    | 25.1 [2.02]               |
|           | <4y College or Associate Degree  | 109 [4.76]                              | 109 [5.08]                | 25.4 [4.51]                             | 31.1 [4.06]               | 36.1 [3.95]                           | 33.8 [3.56]               | 23.8 [1.24]                    | 21.5 [1.23]               |
|           | Bachelor/Advanced                | 92.7 [6.49]                             | 109 [5.31]                | 24.8 [2.98]†                            | 34.7 [5.96]†              | 27.7 [5.17]†                          | 24.3 [3.69]†              | 20.4 [1.52]                    | 21.4 [1.63]               |

† Estimate should be interpreted with caution because it has low statistical precision. It is based on a sample size of less than 50, or the coefficient of variation of the estimate is larger than 30%.

Table S3. Sample-weighted geometric means [standard error] by demographic and tobacco user group for PATH Study Wave 1 (2013-2014): 3-Methylhippuric acid + 4-Methylhippuric acid (34MH).

| 34MH      |                                  | Every Day Established Combustible Users |                           | Every Day Established E-Cigarette Users |                           | Every Day Established Smokeless Users |                           | Never Users                    |                           |
|-----------|----------------------------------|-----------------------------------------|---------------------------|-----------------------------------------|---------------------------|---------------------------------------|---------------------------|--------------------------------|---------------------------|
| Predictor | Level                            | Non-Creatinine Ratioed [ng/mL]          | Creatinine Ratioed [µg/g] | Non-Creatinine Ratioed [ng/mL]          | Creatinine Ratioed [µg/g] | Non-Creatinine Ratioed [ng/mL]        | Creatinine Ratioed [µg/g] | Non-Creatinine Ratioed [ng/mL] | Creatinine Ratioed [µg/g] |
| All       | All                              | 763 [19.9]                              | 781 [17.9]                | 172 [15.6]                              | 195 [13.4]                | 192 [15.7]                            | 189 [12.4]                | 161 [6.01]                     | 151 [4.48]                |
| Age       | 18 – 24                          | 582 [52.3]                              | 489 [35.6]                | 146 [59.4]†                             | 174 [32.3]†               | 228 [49.5]                            | 161 [26.1]                | 164 [9.57]                     | 124 [6.44]                |
|           | 25 – 34                          | 821 [38.0]                              | 694 [31.0]                | 184 [37.6]†                             | 174 [25.4]†               | 250 [32.6]                            | 201 [27.6]                | 169 [17.9]                     | 137 [10.5]                |
|           | 35 – 54                          | 807 [31.5]                              | 835 [30.1]                | 179 [27.8]                              | 196 [22.8]                | 193 [21.9]                            | 183 [18.1]                | 164 [10.5]                     | 156 [9.92]                |
|           | ≥55                              | 739 [37.7]                              | 943 [27.4]                | 153 [32.2]†                             | 229 [28.7]†               | 155 [22.8]                            | 200 [16.6]                | 153 [8.33]                     | 172 [7.68]                |
| Sex       | Male                             | 827 [26.5]                              | 715 [21.1]                | 192 [26.3]                              | 166 [17.9]                | 196 [17.0]                            | 191 [13.1]                | 172 [9.34]                     | 140 [6.24]                |
|           | Female                           | 702 [27.2]                              | 856 [26.3]                | 159 [20.4]                              | 218 [19.8]                | 126 [30.4]†                           | 152 [37.9]†               | 155 [6.88]                     | 159 [5.07]                |
| Race      | Non-Hispanic White               | 812 [26.4]                              | 928 [24.3]                | 167 [15.8]                              | 202 [14.0]                | 189 [17.1]                            | 187 [13.9]                | 178 [8.10]                     | 179 [6.94]                |
|           | Non-Hispanic Black               | 736 [45.5]                              | 514 [26.5]                | 296 [89.4]†                             | 159 [44.7]†               | 146 [36.6]†                           | 129 [34.2]†               | 143 [12.7]                     | 109 [6.99]                |
|           | Hispanic                         | 595 [43.3]                              | 524 [26.6]                | 209 [64.7]†                             | 209 [51.3]†               | 227 [97.4]†                           | 262 [83.9]†               | 140 [9.32]                     | 128 [6.33]                |
|           | Other Race/Multiracial Ethnicity | 553 [62.9]                              | 609 [55.5]                | 86.6 [49.2]†                            | 93.3 [39.0]†              | 312 [90.1]†                           | 266 [64.6]†               | 142 [21.8]                     | 131 [18.9]                |
| Education | <High School/GED                 | 809 [30.6]                              | 835 [30.7]                | 205 [47.4]†                             | 201 [41.8]†               | 178 [35.3]                            | 192 [19.6]                | 154 [11.8]                     | 145 [9.88]                |
|           | HS Diploma                       | 802 [38.6]                              | 809 [36.5]                | 188 [32.7]†                             | 182 [23.2]†               | 218 [29.0]                            | 212 [28.1]                | 188 [16.7]                     | 165 [11.1]                |
|           | <4y College or Associate Degree  | 727 [32.3]                              | 728 [30.6]                | 170 [27.9]                              | 209 [22.0]                | 196 [19.6]                            | 187 [14.6]                | 169 [9.43]                     | 152 [7.79]                |
|           | Bachelor/Advanced                | 596 [49.9]                              | 702 [32.0]                | 127 [18.8]†                             | 177 [23.6]†               | 157 [26.1]†                           | 138 [19.4]†               | 139 [8.99]                     | 143 [8.73]                |

† Estimate should be interpreted with caution because it has low statistical precision. It is based on a sample size of less than 50, or the coefficient of variation of the estimate is larger than 30%.

Table S4. Sample-weighted geometric means [standard error] by demographic and tobacco user group for PATH Study Wave 1 (2013-2014): *N*-acetyl-*S*-(2-carbamoylethyl)-*L*-cysteine (2CAEMA).

| 2CAEMA    |                                  | Every Day Established Combustible Users |                           | Every Day Established E-Cigarette Users |                           | Every Day Established Smokeless Users |                           | Never Users                    |                           |
|-----------|----------------------------------|-----------------------------------------|---------------------------|-----------------------------------------|---------------------------|---------------------------------------|---------------------------|--------------------------------|---------------------------|
| Predictor | Level                            | Non-Creatinine Ratioed [ng/mL]          | Creatinine Ratioed [µg/g] | Non-Creatinine Ratioed [ng/mL]          | Creatinine Ratioed [µg/g] | Non-Creatinine Ratioed [ng/mL]        | Creatinine Ratioed [µg/g] | Non-Creatinine Ratioed [ng/mL] | Creatinine Ratioed [µg/g] |
| All       | All                              | 149 [3.71]                              | 152 [2.55]                | 54.5 [4.69]                             | 61.7 [4.18]               | 48.7 [2.06]                           | 47.9 [1.76]               | 48.1 [1.68]                    | 45.0 [1.16]               |
| Age       | 18 – 24                          | 169 [11.6]                              | 143 [6.07]                | 58.9 [25.7]†                            | 70.4 [11.8]†              | 62.0 [6.77]                           | 43.8 [3.72]               | 54.5 [3.36]                    | 41.4 [2.34]               |
|           | 25 – 34                          | 182 [7.76]                              | 153 [5.55]                | 75.2 [12.0]†                            | 71.1 [11.5]†              | 52.4 [5.60]                           | 42.0 [3.97]               | 54.3 [3.92]                    | 43.6 [3.63]               |
|           | 35 – 54                          | 155 [5.90]                              | 160 [4.92]                | 53.9 [6.30]                             | 59.0 [6.14]               | 52.2 [3.50]                           | 49.7 [2.89]               | 47.6 [3.09]                    | 45.3 [2.24]               |
|           | ≥55                              | 114 [4.59]                              | 145 [4.43]                | 35.7 [6.56]†                            | 53.4 [5.20]†              | 38.6 [2.82]                           | 49.8 [3.57]               | 42.4 [2.32]                    | 47.4 [1.77]               |
| Sex       | Male                             | 171 [5.04]                              | 148 [3.14]                | 69.6 [7.50]                             | 60.2 [7.24]               | 49.3 [2.23]                           | 48.0 [1.82]               | 53.4 [3.24]                    | 43.1 [2.23]               |
|           | Female                           | 129 [4.12]                              | 157 [4.00]                | 45.9 [5.23]                             | 62.8 [4.96]               | 38.1 [6.44]†                          | 45.9 [6.55]†              | 45.1 [1.95]                    | 46.2 [1.27]               |
| Race      | Non-Hispanic White               | 142 [4.27]                              | 162 [3.17]                | 53.3 [5.11]                             | 64.3 [4.69]               | 47.7 [2.16]                           | 47.0 [1.61]               | 47.0 [2.08]                    | 46.9 [1.45]               |
|           | Non-Hispanic Black               | 192 [9.91]                              | 134 [7.01]                | 95.6 [21.1]†                            | 51.4 [9.09]†              | 49.8 [13.3]†                          | 44.1 [8.41]†              | 47.6 [4.59]                    | 36.3 [1.68]               |
|           | Hispanic                         | 145 [7.64]                              | 127 [4.73]                | 40.6 [17.6]†                            | 40.7 [14.6]†              | 85.4 [44.3]†                          | 106 [51.0]†               | 50.0 [4.23]                    | 45.5 [2.79]               |
|           | Other Race/Multiracial Ethnicity | 126 [10.9]                              | 139 [8.23]                | 51.7 [18.7]†                            | 55.7 [16.6]†              | 53.4 [5.15]†                          | 45.6 [6.33]†              | 51.0 [4.97]                    | 46.8 [4.03]               |
| Education | <High School/GED                 | 152 [5.66]                              | 157 [4.46]                | 64.4 [12.8]†                            | 63.2 [11.0]†              | 46.1 [4.17]                           | 50.1 [3.35]               | 49.1 [4.13]                    | 46.3 [3.08]               |
|           | HS Diploma                       | 155 [7.30]                              | 157 [5.67]                | 59.4 [9.78]†                            | 57.5 [8.89]†              | 48.1 [4.44]                           | 46.8 [3.56]               | 50.3 [3.78]                    | 43.6 [2.45]               |
|           | <4y College or Associate Degree  | 148 [5.34]                              | 149 [4.14]                | 52.2 [8.58]                             | 64.2 [6.44]               | 50.4 [2.89]                           | 48.2 [2.58]               | 49.9 [2.61]                    | 44.6 [1.46]               |
|           | Bachelor/Advanced                | 113 [8.25]                              | 131 [5.50]                | 44.2 [10.2]†                            | 61.8 [10.9]†              | 51.9 [6.83]†                          | 45.5 [4.30]†              | 44.3 [3.19]                    | 45.8 [2.30]               |

† Estimate should be interpreted with caution because it has low statistical precision. It is based on a sample size of less than 50, or the coefficient of variation of the estimate is larger than 30%.

Table S5. Sample-weighted geometric means [standard error] by demographic and tobacco user group for PATH Study Wave 1 (2013-2014): *N*-acetyl-*S*-(*N*-methylcarbamoyl)-*L*-cysteine (MCAMA).

| MCAMA     |                                  | Every Day Established Combustible Users |                           | Every Day Established E-Cigarette Users |                           | Every Day Established Smokeless Users |                           | Never Users                    |                           |
|-----------|----------------------------------|-----------------------------------------|---------------------------|-----------------------------------------|---------------------------|---------------------------------------|---------------------------|--------------------------------|---------------------------|
| Predictor | Level                            | Non-Creatinine Ratioed [ng/mL]          | Creatinine Ratioed [µg/g] | Non-Creatinine Ratioed [ng/mL]          | Creatinine Ratioed [µg/g] | Non-Creatinine Ratioed [ng/mL]        | Creatinine Ratioed [µg/g] | Non-Creatinine Ratioed [ng/mL] | Creatinine Ratioed [µg/g] |
| All       | All                              | 527 [10.9]                              | 540 [11.0]                | 180 [12.5]                              | 203 [12.0]                | 135 [5.39]                            | 133 [4.77]                | 111 [3.45]                     | 104 [3.08]                |
| Age       | 18 – 24                          | 363 [16.0]                              | 304 [10.6]                | 98.5 [20.9]†                            | 118 [30.8]†               | 137 [13.9]                            | 97.0 [9.27]               | 90.0 [5.12]                    | 68.5 [3.45]               |
|           | 25 – 34                          | 516 [21.5]                              | 438 [19.2]                | 165 [25.6]†                             | 155 [16.1]†               | 146 [17.6]                            | 119 [9.99]                | 104 [7.11]                     | 84.4 [5.02]               |
|           | 35 – 54                          | 574 [20.8]                              | 594 [21.3]                | 208 [27.0]                              | 227 [21.2]                | 146 [8.81]                            | 139 [5.78]                | 115 [8.28]                     | 109 [6.12]                |
|           | ≥55                              | 548 [22.0]                              | 700 [24.4]                | 184 [33.1]†                             | 275 [33.4]†               | 112 [8.57]                            | 145 [13.2]                | 121 [6.54]                     | 136 [8.11]                |
| Sex       | Male                             | 519 [13.0]                              | 449 [10.3]                | 187 [24.6]                              | 162 [16.9]                | 135 [5.86]                            | 132 [5.04]                | 107 [4.86]                     | 87.0 [4.21]               |
|           | Female                           | 535 [17.3]                              | 653 [17.8]                | 174 [19.0]                              | 238 [19.3]                | 137 [15.0]†                           | 164 [20.9]†               | 112 [4.82]                     | 115 [3.71]                |
| Race      | Non-Hispanic White               | 561 [13.7]                              | 642 [14.2]                | 179 [13.9]                              | 216 [14.2]                | 134 [6.49]                            | 133 [4.86]                | 123 [5.24]                     | 123 [5.43]                |
|           | Non-Hispanic Black               | 479 [23.8]                              | 334 [13.9]                | 242 [29.4]†                             | 130 [17.3]†               | 129 [26.2]†                           | 114 [21.6]†               | 82.8 [7.77]                    | 63.2 [3.57]               |
|           | Hispanic                         | 446 [30.6]                              | 391 [17.1]                | 169 [30.1]†                             | 170 [30.7]†               | 168 [54.6]†                           | 194 [60.6]†               | 106 [5.71]                     | 96.8 [5.01]               |
|           | Other Race/Multiracial Ethnicity | 396 [39.2]                              | 438 [34.1]                | 115 [41.9]†                             | 124 [42.0]†               | 145 [16.7]†                           | 124 [18.5]†               | 95.7 [10.7]                    | 88.0 [8.71]               |
| Education | <High School/GED                 | 532 [19.7]                              | 550 [21.5]                | 200 [36.7]†                             | 197 [23.0]†               | 135 [8.52]                            | 146 [13.1]                | 117 [8.52]                     | 110 [7.14]                |
|           | HS Diploma                       | 562 [20.7]                              | 567 [22.1]                | 203 [33.3]†                             | 197 [20.6]†               | 138 [12.7]                            | 135 [7.69]                | 118 [6.42]                     | 103 [6.00]                |
|           | <4y College or Associate Degree  | 514 [16.9]                              | 514 [17.3]                | 161 [19.1]                              | 198 [20.9]                | 133 [8.23]                            | 127 [7.23]                | 107 [7.02]                     | 96.0 [5.16]               |
|           | Bachelor/Advanced                | 422 [32.2]                              | 500 [24.9]                | 170 [22.3]†                             | 238 [20.7]†               | 135 [19.6]†                           | 119 [11.9]†               | 105 [7.06]                     | 109 [5.70]                |

† Estimate should be interpreted with caution because it has low statistical precision. It is based on a sample size of less than 50, or the coefficient of variation of the estimate is larger than 30%.

Table S6. Sample-weighted geometric means [standard error] by demographic and tobacco user group for PATH Study Wave 1 (2013-2014): *N*-acetyl-S-(benzyl)-L-cysteine (BZMA).

| BZMA      |                                  | Every Day Established Combustible Users |                           | Every Day Established E-Cigarette Users |                           | Every Day Established Smokeless Users |                           | Never Users                    |                           |
|-----------|----------------------------------|-----------------------------------------|---------------------------|-----------------------------------------|---------------------------|---------------------------------------|---------------------------|--------------------------------|---------------------------|
| Predictor | Level                            | Non-Creatinine Ratioed [ng/mL]          | Creatinine Ratioed [µg/g] | Non-Creatinine Ratioed [ng/mL]          | Creatinine Ratioed [µg/g] | Non-Creatinine Ratioed [ng/mL]        | Creatinine Ratioed [µg/g] | Non-Creatinine Ratioed [ng/mL] | Creatinine Ratioed [µg/g] |
| All       | All                              | 6.42 [0.199]                            | 6.58 [0.179]              | 6.58 [0.590]                            | 7.45 [0.659]              | 5.55 [0.235]                          | 5.47 [0.198]              | 6.50 [0.242]                   | 6.10 [0.189]              |
| Age       | 18 – 24                          | 6.27 [0.379]                            | 5.28 [0.188]              | 4.41 [1.36]†                            | 5.28 [0.780]†             | 5.26 [0.689]                          | 3.72 [0.314]              | 5.90 [0.314]                   | 4.49 [0.184]              |
|           | 25 – 34                          | 6.98 [0.295]                            | 5.92 [0.205]              | 7.11 [1.25]†                            | 6.72 [0.960]†             | 6.30 [0.856]                          | 5.11 [0.630]              | 7.23 [0.585]                   | 5.86 [0.322]              |
|           | 35 – 54                          | 6.99 [0.335]                            | 7.22 [0.362]              | 7.98 [1.32]                             | 8.73 [1.28]               | 5.81 [0.420]                          | 5.54 [0.319]              | 6.70 [0.495]                   | 6.37 [0.331]              |
|           | ≥55                              | 5.34 [0.395]                            | 6.83 [0.385]              | 4.79 [0.732]†                           | 7.16 [1.41]†              | 4.83 [0.518]                          | 6.27 [0.468]              | 6.22 [0.452]                   | 6.97 [0.476]              |
| Sex       | Male                             | 7.01 [0.280]                            | 6.07 [0.264]              | 6.15 [0.955]                            | 5.33 [0.717]              | 5.56 [0.247]                          | 5.43 [0.206]              | 6.20 [0.402]                   | 5.02 [0.293]              |
|           | Female                           | 5.87 [0.261]                            | 7.16 [0.252]              | 6.90 [0.846]                            | 9.45 [1.04]               | 5.39 [1.08]†                          | 6.49 [0.797]†             | 6.69 [0.339]                   | 6.87 [0.260]              |
| Race      | Non-Hispanic White               | 5.60 [0.195]                            | 6.40 [0.210]              | 6.28 [0.617]                            | 7.59 [0.771]              | 5.65 [0.265]                          | 5.59 [0.235]              | 5.97 [0.312]                   | 5.98 [0.287]              |
|           | Non-Hispanic Black               | 10.8 [0.804]                            | 7.56 [0.555]              | 11.0 [2.11]†                            | 5.90 [0.647]†             | 7.81 [2.32]†                          | 6.92 [1.26]†              | 9.91 [0.789]                   | 7.57 [0.522]              |
|           | Hispanic                         | 6.95 [0.433]                            | 6.13 [0.400]              | 8.41 [3.73]†                            | 8.43 [2.31]†              | 3.10 [0.484]†                         | 3.58 [0.378]†             | 6.01 [0.515]                   | 5.48 [0.349]              |
|           | Other Race/Multiracial Ethnicity | 6.35 [0.546]                            | 6.99 [0.482]              | 5.58 [1.59]†                            | 6.01 [1.45]†              | 4.13 [0.622]†                         | 3.67 [0.427]†             | 7.04 [1.14]                    | 6.47 [0.833]              |
| Education | <High School/GED                 | 6.25 [0.426]                            | 6.47 [0.372]              | 6.69 [1.87]†                            | 6.56 [1.64]†              | 5.02 [0.551]                          | 5.43 [0.468]              | 6.36 [0.476]                   | 5.97 [0.368]              |
|           | HS Diploma                       | 6.24 [0.439]                            | 6.31 [0.402]              | 6.01 [1.08]†                            | 5.82 [1.02]†              | 5.52 [0.413]                          | 5.40 [0.423]              | 5.88 [0.383]                   | 5.15 [0.287]              |
|           | <4y College or Associate Degree  | 6.66 [0.224]                            | 6.66 [0.176]              | 6.69 [0.896]                            | 8.23 [1.16]               | 5.43 [0.500]                          | 5.22 [0.427]              | 6.42 [0.379]                   | 5.77 [0.292]              |
|           | Bachelor/Advanced                | 6.94 [0.681]                            | 8.17 [0.829]              | 7.33 [1.68]†                            | 10.3 [1.88]†              | 7.33 [1.09]†                          | 6.44 [0.908]†             | 7.23 [0.544]                   | 7.48 [0.405]              |

† Estimate should be interpreted with caution because it has low statistical precision. It is based on a sample size of less than 50, or the coefficient of variation of the estimate is larger than 30%.

Table S7. Sample-weighted geometric means [standard error] by demographic and tobacco user group for PATH Study Wave 1 (2013-2014): *N*-acetyl-S-(2-carboxyethyl)-L-cysteine (2COEMA).

| 2COEMA    |                                  | Every Day Established Combustible Users |                           | Every Day Established E-Cigarette Users |                           | Every Day Established Smokeless Users |                           | Never Users                    |                           |
|-----------|----------------------------------|-----------------------------------------|---------------------------|-----------------------------------------|---------------------------|---------------------------------------|---------------------------|--------------------------------|---------------------------|
| Predictor | Level                            | Non-Creatinine Ratioed [ng/mL]          | Creatinine Ratioed [µg/g] | Non-Creatinine Ratioed [ng/mL]          | Creatinine Ratioed [µg/g] | Non-Creatinine Ratioed [ng/mL]        | Creatinine Ratioed [µg/g] | Non-Creatinine Ratioed [ng/mL] | Creatinine Ratioed [µg/g] |
| All       | All                              | 293 [7.77]                              | 299 [6.31]                | 102 [8.17]                              | 115 [7.01]                | 96.8 [5.98]                           | 95.8 [4.00]               | 100 [3.27]                     | 93.7 [2.26]               |
| Age       | 18 – 24                          | 208 [17.5]                              | 176 [9.49]                | 66.3 [20.7]†                            | 80.8 [14.5]†              | 89.3 [11.3]                           | 64.6 [5.43]               | 97.7 [4.30]                    | 74.1 [2.07]               |
|           | 25 – 34                          | 292 [15.6]                              | 246 [11.2]                | 123 [13.6]†                             | 112 [13.7]†               | 96.2 [12.3]                           | 75.9 [7.35]               | 107 [7.66]                     | 85.7 [5.67]               |
|           | 35 – 54                          | 308 [13.5]                              | 319 [10.8]                | 93.0 [12.6]                             | 105 [8.36]                | 97.7 [6.18]                           | 94.1 [5.32]               | 98.9 [5.91]                    | 93.6 [4.09]               |
|           | ≥55                              | 316 [17.8]                              | 399 [13.4]                | 103 [26.8]†                             | 149 [16.6]†               | 98.0 [13.2]                           | 126 [9.70]                | 99.2 [6.03]                    | 112 [5.25]                |
| Sex       | Male                             | 313 [11.1]                              | 271 [6.06]                | 131 [12.6]                              | 115 [11.8]                | 96.2 [6.15]                           | 94.2 [3.96]               | 110 [5.48]                     | 88.2 [3.37]               |
|           | Female                           | 274 [11.3]                              | 331 [12.4]                | 84.6 [9.31]                             | 115 [6.85]                | 111 [33.6]†                           | 133 [33.0]†               | 95.0 [4.17]                    | 97.1 [3.24]               |
| Race      | Non-Hispanic White               | 283 [9.29]                              | 322 [8.22]                | 92.7 [8.57]                             | 111 [7.51]                | 93.4 [6.84]                           | 92.9 [4.25]               | 95.6 [4.03]                    | 95.5 [2.82]               |
|           | Non-Hispanic Black               | 385 [18.3]                              | 270 [12.2]                | 253 [32.1]†                             | 136 [13.3]†               | 174 [47.6]†                           | 154 [19.0]†               | 131 [12.7]                     | 99.6 [4.92]               |
|           | Hispanic                         | 263 [14.4]                              | 228 [9.08]                | 109 [30.7]†                             | 122 [20.7]†               | 108 [44.1]†                           | 134 [43.8]†               | 94.5 [6.75]                    | 86.4 [5.21]               |
|           | Other Race/Multiracial Ethnicity | 222 [21.9]                              | 245 [18.1]                | 148 [51.6]†                             | 159 [50.5]†               | 109 [12.5]†                           | 93.2 [10.8]†              | 102 [8.78]                     | 91.0 [5.36]               |
| Education | <High School/GED                 | 303 [13.6]                              | 305 [11.7]                | 112 [21.1]†                             | 108 [15.1]†               | 112 [13.5]                            | 121 [9.59]                | 110 [8.49]                     | 103 [6.68]                |
|           | HS Diploma                       | 311 [13.9]                              | 315 [9.27]                | 125 [18.2]†                             | 118 [16.0]†               | 87.3 [7.42]                           | 86.4 [5.67]               | 104 [6.67]                     | 90.2 [5.54]               |
|           | <4y College or Associate Degree  | 278 [12.1]                              | 279 [13.1]                | 86.7 [15.5]                             | 110 [9.35]                | 94.1 [9.54]                           | 90.3 [7.11]               | 100 [6.69]                     | 89.9 [3.23]               |
|           | Bachelor/Advanced                | 254 [19.3]                              | 300 [18.6]                | 94.5 [18.5]†                            | 126 [14.1]†               | 100 [13.1]†                           | 86.9 [10.1]†              | 92.7 [5.16]                    | 95.3 [3.82]               |

† Estimate should be interpreted with caution because it has low statistical precision. It is based on a sample size of less than 50, or the coefficient of variation of the estimate is larger than 30%.

Table S8. Sample-weighted geometric means [standard error] by demographic and tobacco user group for PATH Study Wave 1 (2013-2014): *N*-acetyl-S-(1-cyano-2-hydroxyethyl)-L-cysteine (1CYHEMA).

| 1CY2HEMA  |                                  | Every Day Established Combustible Users |                           | Every Day Established E-Cigarette Users |                           | Every Day Established Smokeless Users |                           | Never Users                    |                           |
|-----------|----------------------------------|-----------------------------------------|---------------------------|-----------------------------------------|---------------------------|---------------------------------------|---------------------------|--------------------------------|---------------------------|
| Predictor | Level                            | Non-Creatinine Ratioed [ng/mL]          | Creatinine Ratioed [µg/g] | Non-Creatinine Ratioed [ng/mL]          | Creatinine Ratioed [µg/g] | Non-Creatinine Ratioed [ng/mL]        | Creatinine Ratioed [µg/g] | Non-Creatinine Ratioed [ng/mL] | Creatinine Ratioed [µg/g] |
| All       | All                              | 27.5 [0.822]                            | 28.2 [0.734]              | 2.43 [0.164]                            | 2.75 [0.227]              | 2.00 [0.035]                          | 1.96 [0.094]              | 1.94 [0.023]                   | 1.82 [0.057]              |
| Age       | 18 – 24                          | 21.1 [1.90]                             | 17.8 [1.18]               | 3.52 [0.871]                            | 4.21 [1.30]               | 1.98 [0.089]                          | 1.40 [0.177]              | 2.07 [0.118]                   | 1.57 [0.106]              |
|           | 25 – 34                          | 29.2 [1.89]                             | 24.7 [1.44]               | 3.06 [0.581]                            | 2.90 [0.608]              | 2.17 [0.149]                          | 1.75 [0.189]              | 2.00 [0.080]                   | 1.63 [0.099]              |
|           | 35 – 54                          | 29.8 [1.41]                             | 30.9 [1.30]               | 2.13 [0.130]                            | 2.33 [0.261]              | 2.03 [0.096]                          | 1.93 [0.123]              | 1.87 [0.014]                   | 1.77 [0.105]              |
|           | ≥55                              | 26.0 [1.65]                             | 33.1 [1.86]               | 2.03 [0.141]                            | 3.03 [0.519]              | 1.85 [0.010]                          | 2.39 [0.246]              | 1.93 [0.037]                   | 2.16 [0.102]              |
| Sex       | Male                             | 28.6 [1.22]                             | 24.7 [0.852]              | 2.62 [0.326]                            | 2.27 [0.350]              | 2.01 [0.037]                          | 1.95 [0.104]              | 2.02 [0.058]                   | 1.64 [0.070]              |
|           | Female                           | 26.5 [1.12]                             | 32.3 [1.32]               | 2.30 [0.181]                            | 3.15 [0.297]              | 1.84 [0.00]                           | 2.21 [0.367]              | 1.89 [0.016]                   | 1.94 [0.078]              |
| Race      | Non-Hispanic White               | 29.0 [0.916]                            | 33.1 [0.898]              | 2.35 [0.152]                            | 2.84 [0.262]              | 1.96 [0.032]                          | 1.93 [0.102]              | 1.94 [0.033]                   | 1.94 [0.088]              |
|           | Non-Hispanic Black               | 28.0 [2.12]                             | 19.5 [1.41]               | 3.66 [1.67]                             | 1.97 [0.968]              | 2.06 [0.275]                          | 1.83 [0.341]              | 1.97 [0.052]                   | 1.50 [0.105]              |
|           | Hispanic                         | 22.1 [2.52]                             | 19.5 [1.63]               | 2.67 [1.13]                             | 2.68 [1.07]               | 3.58 [2.50]                           | 4.14 [2.97]               | 1.88 [0.014]                   | 1.72 [0.088]              |
|           | Other Race/Multiracial Ethnicity | 18.8 [2.29]                             | 20.7 [2.15]               | 2.21 [0.539]                            | 2.38 [0.923]              | 1.92 [0.074]                          | 1.64 [0.270]              | 2.02 [0.147]                   | 1.86 [0.208]              |
| Education | <High School/GED                 | 29.9 [1.53]                             | 30.9 [1.54]               | 2.25 [0.310]                            | 2.21 [0.395]              | 2.01 [0.095]                          | 2.18 [0.282]              | 2.01 [0.113]                   | 1.89 [0.135]              |
|           | HS Diploma                       | 29.7 [1.61]                             | 30.0 [1.53]               | 2.60 [0.393]                            | 2.52 [0.537]              | 2.09 [0.139]                          | 2.03 [0.187]              | 1.94 [0.036]                   | 1.70 [0.098]              |
|           | <4y College or Associate Degree  | 25.2 [1.30]                             | 25.2 [1.33]               | 2.48 [0.254]                            | 3.05 [0.351]              | 1.94 [0.052]                          | 1.86 [0.124]              | 1.93 [0.040]                   | 1.74 [0.078]              |
|           | Bachelor/Advanced                | 20.9 [1.71]                             | 24.7 [1.91]               | 2.18 [0.252]                            | 3.05 [0.466]              | 1.88 [0.038]                          | 1.65 [0.167]              | 1.91 [0.042]                   | 1.97 [0.110]              |

† Estimate should be interpreted with caution because it has low statistical precision. It is based on a sample size of less than 50, or the coefficient of variation of the estimate is larger than 30%.



Table S9. Sample-weighted geometric means [standard error] by demographic and tobacco user group for PATH Study Wave 1 (2013-2014): *N*-acetyl-S-(2-cyanoethyl)-L-cysteine (2CYEMA).

| 2CYEMA    |                                  | Every Day Established Combustible Users |                           | Every Day Established E-Cigarette Users |                           | Every Day Established Smokeless Users |                           | Never Users                    |                           |
|-----------|----------------------------------|-----------------------------------------|---------------------------|-----------------------------------------|---------------------------|---------------------------------------|---------------------------|--------------------------------|---------------------------|
| Predictor | Level                            | Non-Creatinine Ratioed [ng/mL]          | Creatinine Ratioed [µg/g] | Non-Creatinine Ratioed [ng/mL]          | Creatinine Ratioed [µg/g] | Non-Creatinine Ratioed [ng/mL]        | Creatinine Ratioed [µg/g] | Non-Creatinine Ratioed [ng/mL] | Creatinine Ratioed [µg/g] |
| All       | All                              | 168 [4.92]                              | 172 [4.77]                | 3.99 [0.549]                            | 4.51 [0.560]              | 1.79 [0.151]                          | 1.76 [0.114]              | 1.35 [0.049]                   | 1.27 [0.043]              |
| Age       | 18 – 24                          | 106 [10.5]                              | 89.4 [6.80]               | 5.65 [3.28]†                            | 6.75 [3.02]†              | 2.85 [0.640]                          | 2.01 [0.393]              | 1.53 [0.154]                   | 1.17 [0.117]              |
|           | 25 – 34                          | 181 [9.75]                              | 153 [7.97]                | 6.14 [2.20]†                            | 5.80 [2.06]†              | 2.45 [0.412]                          | 1.97 [0.337]              | 1.51 [0.141]                   | 1.22 [0.097]              |
|           | 35 – 54                          | 191 [7.80]                              | 198 [8.21]                | 3.89 [0.882]                            | 4.25 [0.860]              | 1.80 [0.168]                          | 1.72 [0.171]              | 1.30 [0.091]                   | 1.23 [0.081]              |
|           | ≥55                              | 158 [8.12]                              | 202 [8.87]                | 2.17 [0.681]†                           | 3.24 [0.689]†             | 1.27 [0.220]                          | 1.64 [0.189]              | 1.24 [0.079]                   | 1.39 [0.081]              |
| Sex       | Male                             | 186 [6.48]                              | 161 [5.09]                | 5.09 [1.24]                             | 4.40 [1.07]               | 1.80 [0.163]                          | 1.75 [0.123]              | 1.52 [0.107]                   | 1.23 [0.076]              |
|           | Female                           | 152 [6.24]                              | 185 [7.47]                | 3.36 [0.579]                            | 4.60 [0.623]              | 1.66 [0.389]†                         | 1.99 [0.552]†             | 1.26 [0.057]                   | 1.29 [0.053]              |
| Race      | Non-Hispanic White               | 169 [5.25]                              | 193 [6.19]                | 3.86 [0.583]                            | 4.66 [0.655]              | 1.72 [0.156]                          | 1.70 [0.119]              | 1.24 [0.053]                   | 1.24 [0.057]              |
|           | Non-Hispanic Black               | 213 [14.2]                              | 149 [10.1]                | 12.3 [7.16]†                            | 6.62 [3.75]†              | 2.07 [0.874]†                         | 1.83 [0.544]†             | 1.81 [0.253]                   | 1.39 [0.156]              |
|           | Hispanic                         | 123 [12.5]                              | 108 [9.67]                | 2.09 [1.55]†                            | 2.09 [1.29]†              | 2.99 [3.43]†                          | 3.45 [4.10]†              | 1.37 [0.115]                   | 1.25 [0.086]              |
|           | Other Race/Multiracial Ethnicity | 125 [18.9]                              | 138 [17.3]                | 2.66 [2.09]†                            | 2.86 [2.20]†              | 2.66 [0.513]†                         | 2.27 [0.456]†             | 1.43 [0.196]                   | 1.32 [0.147]              |
| Education | <High School/GED                 | 177 [8.19]                              | 183 [8.44]                | 5.41 [2.38]†                            | 5.31 [1.93]†              | 1.91 [0.349]                          | 2.07 [0.265]              | 1.53 [0.203]                   | 1.44 [0.182]              |
|           | HS Diploma                       | 184 [9.37]                              | 185 [8.76]                | 4.93 [1.43]†                            | 4.78 [1.45]†              | 1.74 [0.242]                          | 1.69 [0.241]              | 1.49 [0.141]                   | 1.31 [0.107]              |
|           | <4y College or Associate Degree  | 156 [7.88]                              | 156 [7.30]                | 3.82 [1.01]                             | 4.69 [0.968]              | 1.79 [0.206]                          | 1.71 [0.183]              | 1.32 [0.091]                   | 1.19 [0.069]              |
|           | Bachelor/Advanced                | 133 [11.7]                              | 157 [12.4]                | 2.24 [0.575]†                           | 3.13 [0.828]†             | 1.69 [0.363]†                         | 1.49 [0.209]†             | 1.18 [0.074]                   | 1.22 [0.064]              |

† Estimate should be interpreted with caution because it has low statistical precision. It is based on a sample size of less than 50, or the coefficient of variation of the estimate is larger than 30%.

Table S10. Sample-weighted geometric means [standard error] by demographic and tobacco user group for PATH Study Wave 1 (2013-2014): *N*-acetyl-S-(3,4-dihydroxybutyl)-L-cysteine (34HBMA).

| 34HBMA    |                                  | Every Day Established Combustible Users |                           | Every Day Established E-Cigarette Users |                           | Every Day Established Smokeless Users |                           | Never Users                    |                           |
|-----------|----------------------------------|-----------------------------------------|---------------------------|-----------------------------------------|---------------------------|---------------------------------------|---------------------------|--------------------------------|---------------------------|
| Predictor | Level                            | Non-Creatinine Ratioed [ng/mL]          | Creatinine Ratioed [µg/g] | Non-Creatinine Ratioed [ng/mL]          | Creatinine Ratioed [µg/g] | Non-Creatinine Ratioed [ng/mL]        | Creatinine Ratioed [µg/g] | Non-Creatinine Ratioed [ng/mL] | Creatinine Ratioed [µg/g] |
| All       | All                              | 501 [8.84]                              | 516 [6.27]                | 335 [20.5]                              | 386 [11.5]                | 369 [13.1]                            | 361 [8.26]                | 370 [11.1]                     | 347 [6.17]                |
| Age       | 18 – 24                          | 474 [25.7]                              | 394 [6.83]                | 265 [92.3]†                             | 324 [15.9]†               | 402 [37.8]                            | 277 [12.6]                | 383 [13.6]                     | 295 [6.81]                |
|           | 25 – 34                          | 533 [20.1]                              | 452 [14.9]                | 364 [37.6]†                             | 354 [21.9]†               | 427 [42.1]                            | 318 [21.4]                | 375 [25.7]                     | 293 [17.4]                |
|           | 35 – 54                          | 513 [16.9]                              | 532 [11.4]                | 341 [34.4]                              | 374 [14.3]                | 364 [17.0]                            | 356 [11.2]                | 362 [20.5]                     | 348 [9.36]                |
|           | ≥55                              | 470 [19.1]                              | 616 [12.0]                | 308 [55.9]†                             | 480 [36.4]†               | 338 [28.1]                            | 431 [20.4]                | 370 [16.5]                     | 415 [11.9]                |
| Sex       | Male                             | 561 [12.0]                              | 484 [7.91]                | 383 [33.3]                              | 349 [16.1]                | 370 [13.9]                            | 359 [8.92]                | 387 [16.4]                     | 317 [11.3]                |
|           | Female                           | 444 [12.7]                              | 553 [10.0]                | 306 [25.1]                              | 414 [17.8]                | 338 [46.3]†                           | 417 [51.8]†               | 361 [13.8]                     | 366 [6.21]                |
| Race      | Non-Hispanic White               | 486 [11.0]                              | 556 [7.67]                | 325 [24.3]                              | 401 [14.3]                | 369 [14.9]                            | 361 [9.02]                | 379 [16.1]                     | 381 [8.66]                |
|           | Non-Hispanic Black               | 572 [18.6]                              | 406 [12.8]                | 567 [130]†                              | 311 [39.4]†               | 398 [57.5]†                           | 371 [29.3]†               | 394 [18.9]                     | 283 [9.22]                |
|           | Hispanic                         | 531 [27.0]                              | 472 [13.3]                | 317 [69.7]†                             | 318 [42.7]†               | 345 [63.3]†                           | 428 [99.2]†               | 354 [22.1]                     | 323 [12.7]                |
|           | Other Race/Multiracial Ethnicity | 433 [31.5]                              | 488 [23.1]                | 295 [50.6]†                             | 318 [47.9]†               | 357 [44.2]†                           | 323 [30.0]†               | 319 [23.9]                     | 298 [14.2]                |
| Education | <High School/GED                 | 511 [14.7]                              | 533 [10.3]                | 413 [62.4]†                             | 440 [49.0]†               | 369 [28.5]                            | 396 [30.8]                | 388 [17.2]                     | 357 [11.6]                |
|           | HS Diploma                       | 510 [16.6]                              | 523 [13.5]                | 353 [43.6]†                             | 349 [19.9]†               | 366 [22.4]                            | 358 [15.1]                | 369 [26.3]                     | 330 [17.4]                |
|           | <4y College or Associate Degree  | 499 [13.3]                              | 496 [10.4]                | 316 [37.3]                              | 390 [20.5]                | 362 [21.9]                            | 343 [10.9]                | 379 [18.7]                     | 341 [9.66]                |
|           | Bachelor/Advanced                | 434 [34.5]                              | 512 [15.1]                | 290 [51.3]†                             | 400 [21.3]†               | 397 [40.8]†                           | 349 [24.2]†               | 355 [20.0]                     | 360 [12.3]                |

† Estimate should be interpreted with caution because it has low statistical precision. It is based on a sample size of less than 50, or the coefficient of variation of the estimate is larger than 30%.

Table S11. Sample-weighted geometric means [standard error] by demographic and tobacco user group for PATH Study Wave 1 (2013-2014): *N*-acetyl-S-(2-carbamoyl-2-hydroxyethyl)-L-cysteine (2CAHEMA).

| 2CA2HEMA  |                                  | Every Day Established Combustible Users |                           | Every Day Established E-Cigarette Users |                           | Every Day Established Smokeless Users |                           | Never Users                    |                           |
|-----------|----------------------------------|-----------------------------------------|---------------------------|-----------------------------------------|---------------------------|---------------------------------------|---------------------------|--------------------------------|---------------------------|
| Predictor | Level                            | Non-Creatinine Ratioed [ng/mL]          | Creatinine Ratioed [µg/g] | Non-Creatinine Ratioed [ng/mL]          | Creatinine Ratioed [µg/g] | Non-Creatinine Ratioed [ng/mL]        | Creatinine Ratioed [µg/g] | Non-Creatinine Ratioed [ng/mL] | Creatinine Ratioed [µg/g] |
| All       | All                              | 18.4 [0.362]                            | 18.8 [0.255]              | 10.1 [0.528]                            | 11.4 [0.743]              | 8.95 [0.217]                          | 8.72 [0.333]              | 9.11 [0.149]                   | 8.57 [0.253]              |
| Age       | 18 – 24                          | 21.3 [1.24]                             | 18.0 [0.612]              | 10.8 [2.18]                             | 12.9 [2.98]               | 10.5 [1.07]                           | 7.43 [0.835]              | 9.57 [0.299]                   | 7.31 [0.228]              |
|           | 25 – 34                          | 22.3 [0.958]                            | 18.7 [0.696]              | 11.3 [1.33]                             | 10.8 [1.53]               | 9.41 [0.592]                          | 7.46 [0.535]              | 9.97 [0.562]                   | 8.14 [0.606]              |
|           | 35 – 54                          | 18.3 [0.634]                            | 19.0 [0.465]              | 10.2 [0.923]                            | 11.3 [1.37]               | 9.11 [0.384]                          | 8.75 [0.467]              | 8.99 [0.238]                   | 8.60 [0.458]              |
|           | ≥55                              | 15.0 [0.535]                            | 19.0 [0.548]              | 8.45 [0.618]                            | 12.0 [1.51]               | 8.02 [0.319]                          | 10.0 [0.719]              | 8.58 [0.261]                   | 9.52 [0.445]              |
| Sex       | Male                             | 20.1 [0.523]                            | 17.3 [0.364]              | 10.7 [0.905]                            | 9.33 [1.05]               | 9.01 [0.223]                          | 8.68 [0.365]              | 9.08 [0.313]                   | 7.33 [0.338]              |
|           | Female                           | 16.9 [0.481]                            | 20.5 [0.397]              | 9.66 [0.716]                            | 13.3 [1.09]               | 7.76 [0.641]                          | 9.46 [1.27]               | 9.13 [0.220]                   | 9.41 [0.354]              |
| Race      | Non-Hispanic White               | 18.0 [0.458]                            | 20.5 [0.360]              | 9.99 [0.552]                            | 12.0 [0.876]              | 8.86 [0.223]                          | 8.66 [0.347]              | 9.11 [0.173]                   | 9.12 [0.391]              |
|           | Non-Hispanic Black               | 20.9 [0.848]                            | 14.6 [0.515]              | 13.9 [3.46]                             | 7.64 [1.62]               | 8.84 [1.33]                           | 7.82 [0.944]              | 8.91 [0.384]                   | 6.88 [0.416]              |
|           | Hispanic                         | 18.4 [1.04]                             | 16.4 [0.672]              | 8.92 [2.86]                             | 8.93 [2.84]               | 12.7 [4.56]                           | 15.5 [5.53]               | 9.52 [0.380]                   | 8.71 [0.368]              |
|           | Other Race/Multiracial Ethnicity | 16.6 [1.10]                             | 18.6 [1.07]               | 9.05 [2.29]                             | 9.75 [3.32]               | 8.78 [0.516]                          | 7.44 [0.959]              | 8.47 [0.560]                   | 7.79 [0.775]              |
| Education | <High School/GED                 | 18.9 [0.667]                            | 19.4 [0.476]              | 10.5 [1.81]                             | 10.4 [1.70]               | 8.87 [0.483]                          | 9.42 [0.975]              | 9.00 [0.357]                   | 8.48 [0.451]              |
|           | HS Diploma                       | 18.9 [0.783]                            | 19.1 [0.600]              | 10.9 [1.20]                             | 10.5 [1.56]               | 9.13 [0.499]                          | 8.91 [0.605]              | 9.46 [0.394]                   | 8.21 [0.480]              |
|           | <4y College or Associate Degree  | 18.5 [0.499]                            | 18.3 [0.484]              | 9.57 [0.743]                            | 11.6 [1.10]               | 8.85 [0.319]                          | 8.41 [0.455]              | 9.39 [0.252]                   | 8.48 [0.358]              |
|           | Bachelor/Advanced                | 14.7 [0.952]                            | 17.4 [0.817]              | 9.75 [1.50]                             | 14.0 [2.24]               | 8.87 [0.772]                          | 7.68 [0.692]              | 8.64 [0.262]                   | 9.00 [0.431]              |

† Estimate should be interpreted with caution because it has low statistical precision. It is based on a sample size of less than 50, or the coefficient of variation of the estimate is larger than 30%.

Table S12. Sample-weighted geometric means [standard error] by demographic and tobacco user group for PATH Study Wave 1 (2013-2014): *N*-acetyl-S-(2-hydroxyethyl)-L-cysteine (2HEMA).

| 2HEMA     |                                  | Every Day Established Combustible Users |                           | Every Day Established E-Cigarette Users |                           | Every Day Established Smokeless Users |                           | Never Users                    |                           |
|-----------|----------------------------------|-----------------------------------------|---------------------------|-----------------------------------------|---------------------------|---------------------------------------|---------------------------|--------------------------------|---------------------------|
| Predictor | Level                            | Non-Creatinine Ratioed [ng/mL]          | Creatinine Ratioed [µg/g] | Non-Creatinine Ratioed [ng/mL]          | Creatinine Ratioed [µg/g] | Non-Creatinine Ratioed [ng/mL]        | Creatinine Ratioed [µg/g] | Non-Creatinine Ratioed [ng/mL] | Creatinine Ratioed [µg/g] |
| All       | All                              | 3.04 [0.09117]                          | 3.11 [0.084]              | 0.928 [0.052]                           | 1.09 [0.076]              | 0.898 [0.027]                         | 0.878 [0.040]             | 1.04 [0.035]                   | 0.965 [0.037]             |
| Age       | 18 – 24                          | 2.87 [0.298]                            | 2.41 [0.170]              | 1.06 [0.296]†                           | 1.30 [0.500]†             | 0.920 [0.070]                         | 0.643 [0.079]             | 1.13 [0.065]                   | 0.833 [0.045]             |
|           | 25 – 34                          | 3.51 [0.226]                            | 2.95 [0.150]              | 0.985 [0.115]†                          | 0.941 [0.166]†            | 0.944 [0.082]                         | 0.701 [0.075]             | 1.11 [0.088]                   | 0.911 [0.074]             |
|           | 35 – 54                          | 3.46 [0.173]                            | 3.55 [0.188]              | 0.992 [0.102]                           | 1.11 [0.113]              | 0.908 [0.046]                         | 0.878 [0.050]             | 1.08 [0.055]                   | 1.01 [0.062]              |
|           | ≥55                              | 2.32 [0.122]                            | 2.99 [0.141]              | 0.749 [0.061]†                          | 1.21 [0.168]†             | 0.852 [0.046]                         | 1.09 [0.105]              | 0.920 [0.069]                  | 1.01 [0.082]              |
| Sex       | Male                             | 2.84 [0.105]                            | 2.45 [0.080]              | 0.807 [0.049]                           | 0.716 [0.068]             | 0.902 [0.027]                         | 0.873 [0.041]             | 0.918 [0.053]                  | 0.738 [0.045]             |
|           | Female                           | 3.26 [0.147]                            | 3.98 [0.158]              | 1.02 [0.092]                            | 1.46 [0.106]              | 0.805 [0.107]†                        | 0.991 [0.174]†            | 1.12 [0.048]                   | 1.13 [0.055]              |
| Race      | Non-Hispanic White               | 3.01 [0.110]                            | 3.45 [0.109]              | 0.883 [0.052]                           | 1.10 [0.086]              | 0.887 [0.029]                         | 0.872 [0.042]             | 0.970 [0.052]                  | 0.951 [0.054]             |
|           | Non-Hispanic Black               | 3.38 [0.257]                            | 2.36 [0.184]              | 1.82 [0.699]†                           | 0.989 [0.300]†            | 0.984 [0.240]†                        | 0.907 [0.217]†            | 1.22 [0.088]                   | 0.930 [0.052]             |
|           | Hispanic                         | 3.06 [0.218]                            | 2.67 [0.170]              | 0.808 [0.282]†                          | 0.923 [0.278]†            | 0.993 [0.234]†                        | 1.15 [0.337]†             | 1.13 [0.065]                   | 1.03 [0.061]              |
|           | Other Race/Multiracial Ethnicity | 2.44 [0.305]                            | 2.68 [0.284]              | 1.04 [0.212]†                           | 1.23 [0.290]†             | 0.984 [0.151]†                        | 0.802 [0.089]†            | 1.03 [0.111]                   | 0.950 [0.117]             |
| Education | <High School/GED                 | 3.43 [0.171]                            | 3.50 [0.156]              | 1.01 [0.118]†                           | 0.989 [0.155]†            | 0.958 [0.055]                         | 1.05 [0.131]              | 1.04 [0.064]                   | 0.972 [0.074]             |
|           | HS Diploma                       | 3.15 [0.202]                            | 3.13 [0.175]              | 0.997 [0.122]†                          | 1.03 [0.189]†             | 0.905 [0.064]                         | 0.881 [0.072]             | 0.969 [0.054]                  | 0.840 [0.045]             |
|           | <4y College or Associate Degree  | 2.81 [0.136]                            | 2.86 [0.125]              | 0.933 [0.100]                           | 1.21 [0.121]              | 0.900 [0.064]                         | 0.831 [0.050]             | 1.11 [0.060]                   | 0.979 [0.060]             |
|           | Bachelor/Advanced                | 2.26 [0.252]                            | 2.70 [0.321]              | 0.735 [0.081]†                          | 1.02 [0.141]†             | 0.765 [0.059]†                        | 0.682 [0.064]†            | 1.04 [0.078]                   | 1.07 [0.072]              |

† Estimate should be interpreted with caution because it has low statistical precision. It is based on a sample size of less than 50, or the coefficient of variation of the estimate is larger than 30%.

Table S13. Sample-weighted geometric means [standard error] by demographic and tobacco user group for PATH Study Wave 1 (2013-2014): *N*-acetyl-S-(2-hydroxypropyl)-L-cysteine (2HPMA).

| 2HPMA     |                                  | Every Day Established Combustible Users |                           | Every Day Established E-Cigarette Users |                           | Every Day Established Smokeless Users |                           | Never Users                    |                           |
|-----------|----------------------------------|-----------------------------------------|---------------------------|-----------------------------------------|---------------------------|---------------------------------------|---------------------------|--------------------------------|---------------------------|
| Predictor | Level                            | Non-Creatinine Ratioed [ng/mL]          | Creatinine Ratioed [µg/g] | Non-Creatinine Ratioed [ng/mL]          | Creatinine Ratioed [µg/g] | Non-Creatinine Ratioed [ng/mL]        | Creatinine Ratioed [µg/g] | Non-Creatinine Ratioed [ng/mL] | Creatinine Ratioed [µg/g] |
| All       | All                              | 77.8 [2.06]                             | 79.8 [1.62]               | 34.7 [3.03]                             | 39.0 [2.71]               | 28.4 [1.79]                           | 27.8 [1.45]               | 33.6 [1.67]                    | 31.6 [1.60]               |
| Age       | 18 – 24                          | 63.9 [6.12]                             | 53.9 [3.56]               | 23.7 [7.97]†                            | 28.3 [5.09]†              | 33.2 [4.55]                           | 23.4 [2.29]               | 34.0 [1.86]                    | 26.0 [1.04]               |
|           | 25 – 34                          | 87.0 [6.35]                             | 73.4 [3.88]               | 42.4 [4.98]†                            | 40.0 [5.88]†              | 32.9 [3.24]                           | 26.4 [2.44]               | 35.0 [4.30]                    | 28.7 [3.25]               |
|           | 35 – 54                          | 79.8 [3.22]                             | 82.7 [2.48]               | 31.9 [4.63]                             | 34.3 [4.14]               | 27.6 [2.15]                           | 26.2 [2.14]               | 30.2 [1.64]                    | 28.8 [1.96]               |
|           | ≥55                              | 74.5 [4.42]                             | 95.3 [4.04]               | 33.5 [10.7]†                            | 50.0 [9.43]†              | 25.9 [4.35]                           | 33.5 [4.54]               | 36.8 [4.70]                    | 41.3 [4.95]               |
| Sex       | Male                             | 85.8 [3.14]                             | 74.3 [2.21]               | 39.7 [6.27]                             | 34.4 [5.00]               | 28.6 [1.90]                           | 27.7 [1.51]               | 35.3 [3.57]                    | 28.7 [2.88]               |
|           | Female                           | 70.3 [2.90]                             | 85.9 [2.90]               | 31.5 [4.17]                             | 42.7 [4.13]               | 25.0 [6.91]†                          | 29.4 [7.38]†              | 32.5 [1.59]                    | 33.6 [1.67]               |
| Race      | Non-Hispanic White               | 76.4 [2.32]                             | 87.4 [2.14]               | 32.8 [2.98]                             | 39.3 [2.53]               | 28.1 [1.96]                           | 27.6 [1.50]               | 34.4 [2.71]                    | 34.6 [2.75]               |
|           | Non-Hispanic Black               | 86.7 [6.27]                             | 60.6 [4.18]               | 55.8 [9.99]†                            | 30.0 [6.26]†              | 29.6 [8.68]†                          | 26.2 [6.69]†              | 33.3 [2.46]                    | 25.6 [2.76]               |
|           | Hispanic                         | 81.3 [7.07]                             | 71.5 [4.36]               | 32.0 [20.5]†                            | 32.0 [16.6]†              | 34.5 [12.4]†                          | 39.9 [14.4]†              | 29.7 [2.39]                    | 27.3 [1.70]               |
|           | Other Race/Multiracial Ethnicity | 63.6 [7.37]                             | 70.2 [6.37]               | 69.9 [21.3]†                            | 75.3 [14.9]†              | 30.6 [6.63]†                          | 26.1 [5.63]†              | 38.4 [4.93]                    | 35.2 [4.15]               |
| Education | <High School/GED                 | 83.8 [3.78]                             | 86.7 [3.45]               | 40.7 [8.08]†                            | 40.0 [7.72]†              | 28.2 [4.75]                           | 30.5 [3.08]               | 28.9 [1.93]                    | 27.2 [1.57]               |
|           | HS Diploma                       | 78.5 [4.06]                             | 79.3 [2.99]               | 41.5 [7.38]†                            | 40.1 [6.56]†              | 27.6 [3.28]                           | 26.8 [2.81]               | 29.7 [2.51]                    | 26.1 [1.79]               |
|           | <4y College or Associate Degree  | 74.9 [3.41]                             | 75.1 [3.45]               | 29.1 [4.83]                             | 35.8 [3.02]               | 29.2 [2.60]                           | 27.8 [2.08]               | 33.5 [1.75]                    | 30.2 [1.78]               |
|           | Bachelor/Advanced                | 65.7 [6.11]                             | 77.3 [4.98]               | 33.7 [9.28]†                            | 45.6 [9.35]†              | 28.8 [4.54]†                          | 25.3 [4.26]†              | 40.2 [5.23]                    | 41.9 [5.68]               |

† Estimate should be interpreted with caution because it has low statistical precision. It is based on a sample size of less than 50, or the coefficient of variation of the estimate is larger than 30%.

Table S14. Sample-weighted geometric means [standard error] by demographic and tobacco user group for PATH Study Wave 1 (2013-2014): *N*-acetyl-S-(3-hydroxypropyl)-L-cysteine (3HPMA).

| HPMA      |                                  | Every Day Established Combustible Users |                           | Every Day Established E-Cigarette Users |                           | Every Day Established Smokeless Users |                           | Never Users                    |                           |
|-----------|----------------------------------|-----------------------------------------|---------------------------|-----------------------------------------|---------------------------|---------------------------------------|---------------------------|--------------------------------|---------------------------|
| Predictor | Level                            | Non-Creatinine Ratioed [ng/mL]          | Creatinine Ratioed [µg/g] | Non-Creatinine Ratioed [ng/mL]          | Creatinine Ratioed [µg/g] | Non-Creatinine Ratioed [ng/mL]        | Creatinine Ratioed [µg/g] | Non-Creatinine Ratioed [ng/mL] | Creatinine Ratioed [µg/g] |
| All       | All                              | 1.29E+03 [31.2]                         | 1.32E+03 [33.0]           | 309 [26.5]                              | 354 [22.3]                | 255 [12.8]                            | 249 [10.1]                | 279 [10.1]                     | 262 [7.66]                |
| Age       | 18 – 24                          | 797 [90.2]                              | 670 [56.6]                | 269 [112]†                              | 321 [53.6]†               | 247 [27.1]                            | 176 [17.2]                | 286 [13.6]                     | 218 [9.06]                |
|           | 25 – 34                          | 1.28E+03 [53.7]                         | 1.09E+03 [41.2]           | 403 [43.2]†                             | 381 [47.6]†               | 298 [32.0]                            | 244 [20.2]                | 298 [23.3]                     | 242 [15.4]                |
|           | 35 – 54                          | 1.44E+03 [52.6]                         | 1.48E+03 [59.7]           | 284 [33.8]                              | 311 [22.8]                | 253 [16.8]                            | 239 [14.8]                | 289 [19.9]                     | 274 [18.1]                |
|           | ≥55                              | 1.33E+03 [61.8]                         | 1.69E+03 [63.7]           | 254 [77.0]†                             | 408 [57.6]†               | 237 [29.6]                            | 302 [24.5]                | 254 [15.8]                     | 285 [13.8]                |
| Sex       | Male                             | 1.37E+03 [34.5]                         | 1.19E+03 [30.5]           | 383 [34.7]                              | 337 [32.8]                | 255 [13.2]                            | 247 [9.80]                | 314 [16.6]                     | 254 [9.12]                |
|           | Female                           | 1.21E+03 [52.2]                         | 1.47E+03 [60.5]           | 267 [33.3]                              | 366 [30.4]                | 251 [107]†                            | 302 [111]†                | 260 [12.0]                     | 266 [10.9]                |
| Race      | Non-Hispanic White               | 1.32E+03 [41.4]                         | 1.50E+03 [50.0]           | 291 [27.9]                              | 357 [23.5]                | 253 [14.3]                            | 248 [10.2]                | 267 [11.2]                     | 267 [10.4]                |
|           | Non-Hispanic Black               | 1.37E+03 [67.5]                         | 957 [46.4]                | 654 [126]†                              | 352 [75.8]†               | 279 [65.0]†                           | 247 [27.6]†               | 253 [27.0]                     | 193 [11.5]                |
|           | Hispanic                         | 1.07E+03 [62.9]                         | 944 [41.9]                | 216 [95.2]†                             | 216 [64.8]†               | 287 [81.2]†                           | 332 [100]†                | 289 [25.7]                     | 263 [16.4]                |
|           | Other Race/Multiracial Ethnicity | 1.03E+03 [118]                          | 1.13E+03 [104]            | 516 [112]†                              | 556 [151]†                | 267 [49.0]†                           | 228 [50.1]†               | 403 [46.9]                     | 370 [36.4]                |
| Education | <High School/GED                 | 1.36E+03 [44.9]                         | 1.41E+03 [47.7]           | 391 [76.0]†                             | 384 [48.9]†               | 275 [38.1]                            | 299 [24.7]                | 273 [21.3]                     | 256 [15.2]                |
|           | HS Diploma                       | 1.38E+03 [58.9]                         | 1.40E+03 [59.3]           | 364 [52.4]†                             | 366 [50.5]†               | 249 [19.3]                            | 237 [15.3]                | 292 [21.9]                     | 256 [16.7]                |
|           | <4y College or Associate Degree  | 1.19E+03 [63.7]                         | 1.19E+03 [63.0]           | 268 [49.8]                              | 329 [35.9]                | 249 [23.2]                            | 240 [17.4]                | 284 [16.8]                     | 256 [9.91]                |
|           | Bachelor/Advanced                | 1.07E+03 [81.2]                         | 1.25E+03 [72.7]           | 266 [53.1]†                             | 372 [43.6]†               | 247 [39.2]†                           | 217 [23.5]†               | 266 [18.5]                     | 275 [16.4]                |

† Estimate should be interpreted with caution because it has low statistical precision. It is based on a sample size of less than 50, or the coefficient of variation of the estimate is larger than 30%.

Table S15. Sample-weighted geometric means [standard error] by demographic and tobacco user group for PATH Study Wave 1 (2013-2014): *N*-acetyl-S-(3-hydroxypropyl-1-methyl)-L-cysteine (3HMPMA).

| 3HMPMA    |                                  | Every Day Established Combustible Users |                           | Every Day Established E-Cigarette Users |                           | Every Day Established Smokeless Users |                           | Never Users                    |                           |
|-----------|----------------------------------|-----------------------------------------|---------------------------|-----------------------------------------|---------------------------|---------------------------------------|---------------------------|--------------------------------|---------------------------|
| Predictor | Level                            | Non-Creatinine Ratioed [ng/mL]          | Creatinine Ratioed [µg/g] | Non-Creatinine Ratioed [ng/mL]          | Creatinine Ratioed [µg/g] | Non-Creatinine Ratioed [ng/mL]        | Creatinine Ratioed [µg/g] | Non-Creatinine Ratioed [ng/mL] | Creatinine Ratioed [µg/g] |
| All       | All                              | 2.68E+03 [67.9]                         | 2.74E+03 [68.4]           | 382 [37.2]                              | 432 [36.1]                | 446 [16.3]                            | 438 [16.0]                | 471 [19.4]                     | 442 [13.1]                |
| Age       | 18 – 24                          | 1.63E+03 [153]                          | 1.37E+03 [95.0]           | 376 [136]†                              | 450 [125]†                | 403 [41.5]                            | 284 [14.0]                | 435 [19.0]                     | 331 [11.1]                |
|           | 25 – 34                          | 2.64E+03 [122]                          | 2.23E+03 [101]            | 358 [88.8]†                             | 339 [73.2]†               | 465 [36.3]                            | 374 [29.8]                | 478 [30.5]                     | 388 [18.9]                |
|           | 35 – 54                          | 2.98E+03 [110]                          | 3.08E+03 [119]            | 386 [41.5]                              | 422 [26.1]                | 454 [23.5]                            | 432 [19.4]                | 469 [42.6]                     | 445 [27.0]                |
|           | ≥55                              | 2.82E+03 [143]                          | 3.60E+03 [138]            | 411 [81.9]†                             | 614 [47.3]†               | 436 [36.8]                            | 563 [36.1]                | 491 [34.8]                     | 550 [31.9]                |
| Sex       | Male                             | 2.79E+03 [76.9]                         | 2.42E+03 [65.7]           | 405 [82.6]                              | 350 [59.0]                | 450 [17.5]                            | 437 [17.1]                | 499 [27.7]                     | 405 [20.7]                |
|           | Female                           | 2.56E+03 [106]                          | 3.12E+03 [116]            | 367 [32.1]                              | 503 [29.4]                | 384 [54.3]†                           | 462 [72.7]†               | 455 [24.8]                     | 467 [15.9]                |
| Race      | Non-Hispanic White               | 2.86E+03 [85.7]                         | 3.26E+03 [94.3]           | 369 [39.2]                              | 446 [40.9]                | 446 [17.8]                            | 440 [17.5]                | 472 [26.0]                     | 472 [18.7]                |
|           | Non-Hispanic Black               | 2.59E+03 [141]                          | 1.81E+03 [103]            | 701 [127]†                              | 377 [56.3]†               | 484 [115]†                            | 429 [71.7]†               | 460 [40.5]                     | 351 [17.0]                |
|           | Hispanic                         | 2.00E+03 [118]                          | 1.76E+03 [81.8]           | 347 [97.0]†                             | 347 [65.4]†               | 400 [104]†                            | 462 [149]†                | 466 [45.6]                     | 425 [31.5]                |
|           | Other Race/Multiracial Ethnicity | 2.02E+03 [247]                          | 2.23E+03 [218]            | 324 [64.7]†                             | 349 [87.0]†               | 448 [61.4]†                           | 382 [65.4]†               | 500 [50.4]                     | 460 [47.8]                |
| Education | <High School/GED                 | 2.79E+03 [95.7]                         | 2.89E+03 [104]            | 399 [54.1]†                             | 391 [33.2]†               | 459 [43.0]                            | 497 [41.6]                | 496 [45.1]                     | 466 [36.8]                |
|           | HS Diploma                       | 2.82E+03 [130]                          | 2.85E+03 [139]            | 472 [77.5]†                             | 457 [53.9]†               | 465 [25.8]                            | 452 [23.5]                | 458 [38.4]                     | 401 [25.0]                |
|           | <4y College or Associate Degree  | 2.53E+03 [124]                          | 2.54E+03 [122]            | 328 [68.8]                              | 403 [70.6]                | 422 [24.5]                            | 404 [17.0]                | 463 [22.2]                     | 416 [15.4]                |
|           | Bachelor/Advanced                | 2.26E+03 [172]                          | 2.66E+03 [145]            | 370 [56.9]†                             | 518 [47.3]†               | 434 [51.9]†                           | 381 [28.0]†               | 478 [40.3]                     | 494 [29.4]                |

† Estimate should be interpreted with caution because it has low statistical precision. It is based on a sample size of less than 50, or the coefficient of variation of the estimate is larger than 30%.

Table S16. Sample-weighted geometric means [standard error] by demographic and tobacco user group for PATH Study Wave 1 (2013-2014): *N*-acetyl-S-(4-hydroxy-2-methyl-2-buten-1-yl)-L-cysteine (4HMBEMA).

| 4HMBEMA   |                                  | Every Day Established Combustible Users |                           | Every Day Established E-Cigarette Users |                           | Every Day Established Smokeless Users |                           | Never Users                    |                           |
|-----------|----------------------------------|-----------------------------------------|---------------------------|-----------------------------------------|---------------------------|---------------------------------------|---------------------------|--------------------------------|---------------------------|
| Predictor | Level                            | Non-Creatinine Ratioed [ng/mL]          | Creatinine Ratioed [µg/g] | Non-Creatinine Ratioed [ng/mL]          | Creatinine Ratioed [µg/g] | Non-Creatinine Ratioed [ng/mL]        | Creatinine Ratioed [µg/g] | Non-Creatinine Ratioed [ng/mL] | Creatinine Ratioed [µg/g] |
| All       | All                              | 41.2 [1.23]                             | 42.1 [1.18]               | 3.15 [0.310]                            | 3.60 [0.263]              | 3.41 [0.184]                          | 3.37 [0.159]              | 3.43 [0.137]                   | 3.23 [0.103]              |
| Age       | 18 – 24                          | 24.9 [2.18]                             | 21.0 [1.34]               | 3.40 [1.79]†                            | 4.06 [1.65]†              | 3.17 [0.530]                          | 2.28 [0.278]              | 3.17 [0.225]                   | 2.42 [0.153]              |
|           | 25 – 34                          | 41.7 [2.32]                             | 35.3 [1.83]               | 3.82 [0.729]†                           | 3.69 [0.576]†             | 4.54 [0.697]                          | 3.65 [0.518]              | 3.60 [0.386]                   | 2.92 [0.265]              |
|           | 35 – 54                          | 45.8 [2.20]                             | 47.2 [2.20]               | 2.81 [0.445]                            | 3.07 [0.344]              | 3.50 [0.297]                          | 3.32 [0.233]              | 3.38 [0.260]                   | 3.22 [0.178]              |
|           | ≥55                              | 42.7 [2.26]                             | 54.5 [2.46]               | 2.94 [0.759]†                           | 4.40 [0.719]†             | 2.79 [0.435]                          | 3.67 [0.416]              | 3.55 [0.247]                   | 3.98 [0.235]              |
| Sex       | Male                             | 41.8 [1.53]                             | 36.1 [1.22]               | 3.97 [0.684]                            | 3.48 [0.500]              | 3.41 [0.189]                          | 3.33 [0.165]              | 3.52 [0.210]                   | 2.85 [0.156]              |
|           | Female                           | 40.5 [1.77]                             | 49.3 [1.87]               | 2.70 [0.340]                            | 3.69 [0.335]              | 3.57 [1.16]†                          | 4.30 [1.05]†              | 3.38 [0.175]                   | 3.48 [0.126]              |
| Race      | Non-Hispanic White               | 45.1 [1.53]                             | 51.5 [1.56]               | 3.03 [0.327]                            | 3.71 [0.308]              | 3.33 [0.196]                          | 3.31 [0.176]              | 3.47 [0.172]                   | 3.48 [0.151]              |
|           | Non-Hispanic Black               | 39.2 [2.54]                             | 27.4 [1.85]               | 8.17 [2.50]†                            | 4.39 [1.13]†              | 4.35 [1.01]†                          | 3.85 [0.742]†             | 3.62 [0.343]                   | 2.76 [0.209]              |
|           | Hispanic                         | 27.3 [2.50]                             | 24.1 [2.03]               | 2.44 [0.996]†                           | 2.45 [0.680]†             | 3.77 [2.02]†                          | 4.35 [2.27]†              | 3.18 [0.264]                   | 2.91 [0.162]              |
|           | Other Race/Multiracial Ethnicity | 27.4 [4.25]                             | 29.8 [3.95]               | 1.98 [0.679]†                           | 2.14 [0.613]†             | 4.29 [1.08]†                          | 3.66 [0.988]†             | 3.51 [0.511]                   | 3.28 [0.375]              |
| Education | <High School/GED                 | 42.1 [2.25]                             | 43.4 [2.38]               | 3.17 [0.641]†                           | 3.11 [0.464]†             | 3.06 [0.538]                          | 3.35 [0.358]              | 3.44 [0.340]                   | 3.24 [0.291]              |
|           | HS Diploma                       | 43.9 [2.22]                             | 44.3 [2.19]               | 3.50 [0.805]†                           | 3.49 [0.593]†             | 3.38 [0.371]                          | 3.30 [0.337]              | 3.24 [0.236]                   | 2.84 [0.151]              |
|           | <4y College or Associate Degree  | 39.5 [1.98]                             | 39.5 [1.81]               | 2.94 [0.553]                            | 3.61 [0.453]              | 3.59 [0.392]                          | 3.44 [0.289]              | 3.57 [0.258]                   | 3.22 [0.182]              |
|           | Bachelor/Advanced                | 33.8 [3.13]                             | 39.8 [2.64]               | 3.15 [0.800]†                           | 4.41 [0.786]†             | 3.85 [0.560]†                         | 3.38 [0.443]†             | 3.48 [0.278]                   | 3.59 [0.223]              |

† Estimate should be interpreted with caution because it has low statistical precision. It is based on a sample size of less than 50, or the coefficient of variation of the estimate is larger than 30%.



Table S17. Sample-weighted geometric means [standard error] by demographic and tobacco user group for PATH Study Wave 1 (2013-2014): Mandelic acid (MADA).

| MADA      |                                  | Every Day Established Combustible Users |                           | Every Day Established E-Cigarette Users |                           | Every Day Established Smokeless Users |                           | Never Users                    |                           |
|-----------|----------------------------------|-----------------------------------------|---------------------------|-----------------------------------------|---------------------------|---------------------------------------|---------------------------|--------------------------------|---------------------------|
| Predictor | Level                            | Non-Creatinine Ratioed [ng/mL]          | Creatinine Ratioed [µg/g] | Non-Creatinine Ratioed [ng/mL]          | Creatinine Ratioed [µg/g] | Non-Creatinine Ratioed [ng/mL]        | Creatinine Ratioed [µg/g] | Non-Creatinine Ratioed [ng/mL] | Creatinine Ratioed [µg/g] |
| All       | All                              | 294 [6.74]                              | 300 [4.14]                | 124 [8.61]                              | 143 [6.52]                | 141 [8.51]                            | 140 [6.00]                | 136 [4.30]                     | 128 [2.97]                |
| Age       | 18 – 24                          | 253 [10.9]                              | 214 [6.75]                | 80.4 [34.3]†                            | 96.1 [16.7]†              | 144 [16.5]                            | 101 [6.84]                | 138 [6.53]                     | 105 [4.09]                |
|           | 25 – 34                          | 318 [13.5]                              | 266 [7.90]                | 152 [20.7]†                             | 147 [13.8]†               | 180 [17.4]                            | 146 [15.1]                | 156 [10.7]                     | 124 [5.35]                |
|           | 35 – 54                          | 315 [12.7]                              | 327 [7.69]                | 123 [13.8]                              | 142 [11.7]                | 147 [8.91]                            | 143 [7.44]                | 134 [8.53]                     | 130 [6.59]                |
|           | ≥55                              | 264 [12.8]                              | 335 [9.93]                | 107 [19.0]†                             | 154 [15.7]†               | 112 [16.4]                            | 145 [12.7]                | 126 [7.05]                     | 142 [5.48]                |
| Sex       | Male                             | 319 [10.3]                              | 275 [5.89]                | 139 [15.2]                              | 123 [9.62]                | 143 [9.07]                            | 141 [6.28]                | 151 [6.89]                     | 123 [5.31]                |
|           | Female                           | 269 [8.88]                              | 329 [7.09]                | 115 [10.7]                              | 157 [11.5]                | 104 [24.5]†                           | 128 [20.4]†               | 127 [5.43]                     | 131 [3.77]                |
| Race      | Non-Hispanic White               | 286 [8.62]                              | 327 [5.43]                | 117 [8.91]                              | 145 [7.62]                | 141 [9.49]                            | 141 [6.62]                | 135 [4.96]                     | 135 [4.62]                |
|           | Non-Hispanic Black               | 352 [17.1]                              | 248 [9.93]                | 256 [49.7]†                             | 137 [20.8]†               | 137 [23.2]†                           | 98.9 [14.2]†              | 147 [15.2]                     | 114 [6.40]                |
|           | Hispanic                         | 288 [18.5]                              | 250 [10.0]                | 127 [42.9]†                             | 128 [19.6]†               | 132 [24.9]†                           | 156 [34.7]†               | 136 [9.54]                     | 125 [4.69]                |
|           | Other Race/Multiracial Ethnicity | 219 [16.6]                              | 249 [12.3]                | 102 [35.8]†                             | 120 [23.9]†               | 154 [23.1]†                           | 152 [20.2]†               | 122 [12.6]                     | 114 [6.63]                |
| Education | <High School/GED                 | 306 [10.1]                              | 312 [6.43]                | 156 [24.6]†                             | 150 [15.0]†               | 120 [19.2]                            | 127 [7.46]                | 127 [8.24]                     | 121 [5.97]                |
|           | HS Diploma                       | 299 [13.6]                              | 303 [9.12]                | 125 [20.1]†                             | 125 [11.8]†               | 162 [10.5]                            | 161 [12.7]                | 142 [11.0]                     | 125 [6.32]                |
|           | <4y College or Associate Degree  | 296 [10.2]                              | 295 [7.03]                | 114 [14.5]                              | 144 [10.8]                | 133 [12.7]                            | 130 [9.60]                | 129 [5.98]                     | 117 [4.08]                |
|           | Bachelor/Advanced                | 219 [15.2]                              | 263 [13.7]                | 119 [24.8]†                             | 167 [30.4]†               | 162 [22.3]†                           | 142 [11.4]†               | 141 [8.60]                     | 146 [6.14]                |

† Estimate should be interpreted with caution because it has low statistical precision. It is based on a sample size of less than 50, or the coefficient of variation of the estimate is larger than 30%.

Table S18. Sample-weighted geometric means [standard error] by demographic and tobacco user group for PATH Study Wave 1 (2013-2014): *N*-acetyl-S-(4-hydroxy-2-buten-1-yl)-L-cysteine (t4HBEMA).

| t4HBEMA   |                                  | Every Day Established Combustible Users |                           | Every Day Established E-Cigarette Users |                           | Every Day Established Smokeless Users |                           | Never Users                    |                           |
|-----------|----------------------------------|-----------------------------------------|---------------------------|-----------------------------------------|---------------------------|---------------------------------------|---------------------------|--------------------------------|---------------------------|
| Predictor | Level                            | Non-Creatinine Ratioed [ng/mL]          | Creatinine Ratioed [µg/g] | Non-Creatinine Ratioed [ng/mL]          | Creatinine Ratioed [µg/g] | Non-Creatinine Ratioed [ng/mL]        | Creatinine Ratioed [µg/g] | Non-Creatinine Ratioed [ng/mL] | Creatinine Ratioed [µg/g] |
| All       | All                              | 31.9 [0.787]                            | 32.6 [0.708]              | 4.05 [0.299]                            | 4.58 [0.243]              | 4.44 [0.200]                          | 4.35 [0.176]              | 4.72 [0.155]                   | 4.43 [0.104]              |
| Age       | 18 – 24                          | 21.9 [1.90]                             | 18.4 [1.08]               | 3.51 [1.33]†                            | 4.19 [1.42]†              | 4.02 [0.441]                          | 2.84 [0.250]              | 4.58 [0.212]                   | 3.49 [0.136]              |
|           | 25 – 34                          | 32.8 [1.56]                             | 27.7 [1.17]               | 4.74 [0.652]†                           | 4.48 [0.503]†             | 5.27 [0.489]                          | 4.24 [0.294]              | 4.93 [0.347]                   | 4.00 [0.237]              |
|           | 35 – 54                          | 34.6 [1.30]                             | 35.8 [1.33]               | 3.86 [0.445]                            | 4.22 [0.377]              | 4.69 [0.290]                          | 4.46 [0.253]              | 4.59 [0.291]                   | 4.36 [0.169]              |
|           | ≥55                              | 32.1 [1.51]                             | 41.0 [1.59]               | 3.68 [0.673]†                           | 5.50 [0.475]†             | 3.74 [0.313]                          | 4.83 [0.325]              | 4.84 [0.272]                   | 5.42 [0.251]              |
| Sex       | Male                             | 33.0 [1.01]                             | 28.5 [0.659]              | 4.89 [0.529]                            | 4.24 [0.385]              | 4.49 [0.213]                          | 4.36 [0.187]              | 5.19 [0.234]                   | 4.21 [0.185]              |
|           | Female                           | 30.8 [1.26]                             | 37.5 [1.29]               | 3.54 [0.337]                            | 4.85 [0.300]              | 3.57 [0.804]†                         | 4.30 [0.618]†             | 4.46 [0.188]                   | 4.57 [0.115]              |
| Race      | Non-Hispanic White               | 33.1 [0.997]                            | 37.8 [0.988]              | 3.87 [0.294]                            | 4.68 [0.273]              | 4.37 [0.214]                          | 4.31 [0.185]              | 4.67 [0.198]                   | 4.68 [0.133]              |
|           | Non-Hispanic Black               | 33.0 [1.72]                             | 23.1 [1.21]               | 10.1 [3.48]†                            | 5.41 [1.45]†              | 5.27 [1.42]†                          | 4.67 [0.851]†             | 5.04 [0.509]                   | 3.84 [0.217]              |
|           | Hispanic                         | 26.1 [2.01]                             | 23.0 [1.27]               | 3.62 [1.50]†                            | 3.62 [0.985]†             | 4.29 [1.49]†                          | 4.98 [1.99]†              | 4.54 [0.315]                   | 4.14 [0.183]              |
|           | Other Race/Multiracial Ethnicity | 23.4 [2.68]                             | 25.7 [2.26]               | 2.52 [0.953]†                           | 2.71 [0.841]†             | 5.38 [0.705]†                         | 4.60 [0.708]†             | 5.02 [0.549]                   | 4.62 [0.391]              |
| Education | <High School/GED                 | 31.9 [1.36]                             | 33.0 [1.33]               | 4.01 [0.627]†                           | 3.93 [0.567]†             | 4.49 [0.447]                          | 4.86 [0.450]              | 4.82 [0.317]                   | 4.53 [0.231]              |
|           | HS Diploma                       | 34.2 [1.39]                             | 34.5 [1.23]               | 4.79 [0.643]†                           | 4.64 [0.491]†             | 4.47 [0.296]                          | 4.34 [0.260]              | 4.80 [0.324]                   | 4.20 [0.203]              |
|           | <4y College or Associate Degree  | 30.9 [1.40]                             | 30.9 [1.34]               | 3.84 [0.567]                            | 4.72 [0.419]              | 4.35 [0.262]                          | 4.16 [0.214]              | 4.78 [0.257]                   | 4.29 [0.181]              |
|           | Bachelor/Advanced                | 27.0 [2.06]                             | 31.8 [1.42]               | 3.48 [0.622]†                           | 4.86 [0.616]†             | 4.47 [0.621]†                         | 3.93 [0.349]†             | 4.56 [0.300]                   | 4.71 [0.229]              |

† Estimate should be interpreted with caution because it has low statistical precision. It is based on a sample size of less than 50, or the coefficient of variation of the estimate is larger than 30%.

Table S19. Sample-weighted geometric means [standard error] by demographic and tobacco user group for PATH Study Wave 1 (2013-2014): Phenylglyoxylic acid (PHGA).

| PHGA      |                                  | Every Day Established Combustible Users |                           | Every Day Established E-Cigarette Users |                           | Every Day Established Smokeless Users |                           | Never Users                    |                           |
|-----------|----------------------------------|-----------------------------------------|---------------------------|-----------------------------------------|---------------------------|---------------------------------------|---------------------------|--------------------------------|---------------------------|
| Predictor | Level                            | Non-Creatinine Ratioed [ng/mL]          | Creatinine Ratioed [µg/g] | Non-Creatinine Ratioed [ng/mL]          | Creatinine Ratioed [µg/g] | Non-Creatinine Ratioed [ng/mL]        | Creatinine Ratioed [µg/g] | Non-Creatinine Ratioed [ng/mL] | Creatinine Ratioed [µg/g] |
| All       | All                              | 391 [8.57]                              | 398 [5.73]                | 189 [13.2]                              | 220 [9.80]                | 228 [9.24]                            | 223 [7.39]                | 215 [6.29]                     | 202 [4.26]                |
| Age       | 18 – 24                          | 360 [17.2]                              | 304 [9.83]                | 165 [47.8]†                             | 193 [18.1]†               | 245 [30.9]                            | 172 [11.5]                | 217 [7.60]                     | 167 [4.13]                |
|           | 25 – 34                          | 443 [16.7]                              | 369 [14.2]                | 223 [27.1]†                             | 211 [18.6]†               | 259 [30.7]                            | 195 [17.8]                | 233 [14.8]                     | 188 [6.28]                |
|           | 35 – 54                          | 401 [15.4]                              | 414 [10.8]                | 194 [20.6]                              | 213 [13.5]                | 235 [10.1]                            | 225 [6.25]                | 205 [10.9]                     | 197 [8.65]                |
|           | ≥55                              | 352 [14.3]                              | 445 [11.7]                | 149 [30.5]†                             | 256 [34.5]†               | 198 [24.2]                            | 258 [22.8]                | 218 [11.0]                     | 240 [8.88]                |
| Sex       | Male                             | 426 [11.4]                              | 367 [8.00]                | 220 [18.9]                              | 197 [13.3]                | 231 [9.80]                            | 223 [7.64]                | 236 [12.0]                     | 194 [8.86]                |
|           | Female                           | 358 [12.1]                              | 433 [7.90]                | 171 [15.9]                              | 237 [15.5]                | 181 [30.4]†                           | 222 [51.5]†               | 203 [7.23]                     | 207 [4.56]                |
| Race      | Non-Hispanic White               | 390 [10.8]                              | 443 [7.34]                | 185 [16.0]                              | 231 [11.7]                | 226 [10.6]                            | 222 [8.20]                | 219 [8.16]                     | 220 [7.33]                |
|           | Non-Hispanic Black               | 427 [21.6]                              | 297 [10.9]                | 260 [48.1]†                             | 130 [25.3]†               | 237 [44.4]†                           | 210 [35.5]†               | 215 [16.3]                     | 164 [8.02]                |
|           | Hispanic                         | 388 [23.0]                              | 341 [13.1]                | 204 [68.8]†                             | 205 [47.5]†               | 219 [36.7]†                           | 253 [40.5]†               | 215 [15.3]                     | 193 [8.92]                |
|           | Other Race/Multiracial Ethnicity | 304 [22.4]                              | 333 [17.2]                | 172 [44.5]†                             | 185 [20.3]†               | 269 [45.4]†                           | 229 [23.4]†               | 194 [18.0]                     | 182 [8.56]                |
| Education | <High School/GED                 | 401 [13.9]                              | 412 [10.1]                | 252 [46.7]†                             | 262 [41.5]†               | 211 [18.2]                            | 227 [15.3]                | 221 [11.6]                     | 203 [8.67]                |
|           | HS Diploma                       | 399 [17.5]                              | 405 [12.7]                | 192 [25.4]†                             | 195 [19.4]†               | 251 [18.3]                            | 246 [20.4]                | 218 [11.8]                     | 194 [7.89]                |
|           | <4y College or Associate Degree  | 396 [11.3]                              | 386 [9.99]                | 166 [20.2]                              | 206 [11.7]                | 220 [14.3]                            | 208 [12.1]                | 208 [11.5]                     | 189 [7.62]                |
|           | Bachelor/Advanced                | 301 [24.9]                              | 360 [15.9]                | 196 [29.8]†                             | 270 [30.9]†               | 229 [26.6]†                           | 201 [14.4]†               | 217 [11.7]                     | 222 [10.0]                |

† Estimate should be interpreted with caution because it has low statistical precision. It is based on a sample size of less than 50, or the coefficient of variation of the estimate is larger than 30%.

Table S20. Sample-weighted geometric means [standard error] by demographic and tobacco user group for PATH Study Wave 1 (2013-2014): *N*-acetyl-S-(phenyl)-L-cysteine (PHMA).

| PMA       |                                  | Every Day Established Combustible Users |                           | Every Day Established E-Cigarette Users |                           | Every Day Established Smokeless Users |                           | Never Users                    |                           |
|-----------|----------------------------------|-----------------------------------------|---------------------------|-----------------------------------------|---------------------------|---------------------------------------|---------------------------|--------------------------------|---------------------------|
| Predictor | Level                            | Non-Creatinine Ratioed [ng/mL]          | Creatinine Ratioed [µg/g] | Non-Creatinine Ratioed [ng/mL]          | Creatinine Ratioed [µg/g] | Non-Creatinine Ratioed [ng/mL]        | Creatinine Ratioed [µg/g] | Non-Creatinine Ratioed [ng/mL] | Creatinine Ratioed [µg/g] |
| All       | All                              | 1.04 [0.024]                            | 1.06 [0.0210]             | 0.919 [0.060]                           | 1.04 [0.070]              | 0.985 [0.041]                         | 0.966 [0.048]             | 1.07 [0.042]                   | 1.01 [0.039]              |
| Age       | 18 – 24                          | 1.06 [0.053]                            | 0.888 [0.059]             | 0.665 [0.151]†                          | 0.795 [0.296]†            | 0.912 [0.105]                         | 0.645 [0.081]             | 1.03 [0.042]                   | 0.780 [0.031]             |
|           | 25 – 34                          | 1.04 [0.040]                            | 0.880 [0.034]             | 0.947 [0.114]†                          | 0.894 [0.105]†            | 1.09 [0.107]                          | 0.877 [0.105]             | 1.16 [0.086]                   | 0.938 [0.075]             |
|           | 35 – 54                          | 1.08 [0.056]                            | 1.12 [0.048]              | 1.00 [0.109]                            | 1.10 [0.108]              | 1.07 [0.072]                          | 1.02 [0.064]              | 1.03 [0.063]                   | 0.982 [0.062]             |
|           | ≥55                              | 0.962 [0.038]                           | 1.23 [0.043]              | 0.832 [0.152]†                          | 1.24 [0.173]†             | 0.819 [0.083]                         | 1.06 [0.107]              | 1.11 [0.081]                   | 1.24 [0.085]              |
| Sex       | Male                             | 1.10 [0.036]                            | 0.951 [0.031]             | 0.974 [0.118]                           | 0.843 [0.088]             | 0.995 [0.042]                         | 0.966 [0.051]             | 1.18 [0.081]                   | 0.957 [0.066]             |
|           | Female                           | 0.977 [0.030]                           | 1.19 [0.032]              | 0.882 [0.073]                           | 1.21 [0.105]              | 0.799 [0.228]†                        | 0.961 [0.220]†            | 1.01 [0.044]                   | 1.04 [0.047]              |
| Race      | Non-Hispanic White               | 1.04 [0.030]                            | 1.19 [0.026]              | 0.878 [0.063]                           | 1.06 [0.079]              | 0.989 [0.046]                         | 0.975 [0.056]             | 1.09 [0.059]                   | 1.09 [0.056]              |
|           | Non-Hispanic Black               | 0.969 [0.058]                           | 0.677 [0.040]             | 1.57 [0.548]†                           | 0.844 [0.257]†            | 0.840 [0.086]†                        | 0.744 [0.106]†            | 0.812 [0.051]                  | 0.620 [0.042]             |
|           | Hispanic                         | 1.17 [0.084]                            | 1.03 [0.051]              | 1.10 [0.557]†                           | 1.10 [0.486]†             | 0.815 [0.253]†                        | 0.942 [0.319]†            | 1.28 [0.103]                   | 1.17 [0.077]              |
|           | Other Race/Multiracial Ethnicity | 0.995 [0.070]                           | 1.10 [0.079]              | 0.810 [0.173]†                          | 0.873 [0.174]†            | 1.20 [0.113]†                         | 1.02 [0.171]†             | 0.985 [0.108]                  | 0.905 [0.101]             |
| Education | <High School/GED                 | 1.05 [0.043]                            | 1.09 [0.038]              | 1.02 [0.136]†                           | 0.997 [0.142]†            | 0.898 [0.069]                         | 0.971 [0.115]             | 1.03 [0.071]                   | 0.969 [0.063]             |
|           | HS Diploma                       | 0.990 [0.041]                           | 1.000 [0.038]             | 0.933 [0.145]†                          | 0.903 [0.111]†            | 0.986 [0.071]                         | 0.959 [0.072]             | 1.22 [0.110]                   | 1.07 [0.083]              |
|           | <4y College or Associate Degree  | 1.09 [0.046]                            | 1.09 [0.050]              | 0.861 [0.085]                           | 1.06 [0.118]              | 1.07 [0.076]                          | 1.02 [0.078]              | 1.02 [0.053]                   | 0.916 [0.061]             |
|           | Bachelor/Advanced                | 0.946 [0.059]                           | 1.11 [0.057]              | 0.957 [0.153]†                          | 1.34 [0.217]†             | 0.976 [0.191]†                        | 0.858 [0.146]†            | 1.04 [0.077]                   | 1.07 [0.074]              |

† Estimate should be interpreted with caution because it has low statistical precision. It is based on a sample size of less than 50, or the coefficient of variation of the estimate is larger than 30%.

Table S21. Sample-weighted geometric means [standard error] by demographic and tobacco user group for PATH Study Wave 1 (2013-2014): 2-thioxothiazolidine-4-carboxylic acid (TTCA).

| TTCA      |                                  | Every Day Established Combustible Users |                           | Every Day Established E-Cigarette Users |                           | Every Day Established Smokeless Users |                           | Never Users                    |                           |
|-----------|----------------------------------|-----------------------------------------|---------------------------|-----------------------------------------|---------------------------|---------------------------------------|---------------------------|--------------------------------|---------------------------|
| Predictor | Level                            | Non-Creatinine Ratioed [ng/mL]          | Creatinine Ratioed [µg/g] | Non-Creatinine Ratioed [ng/mL]          | Creatinine Ratioed [µg/g] | Non-Creatinine Ratioed [ng/mL]        | Creatinine Ratioed [µg/g] | Non-Creatinine Ratioed [ng/mL] | Creatinine Ratioed [µg/g] |
| All       | All                              | 21.1 [0.521]                            | 21.5 [0.556]              | 17.1 [1.78]                             | 19.8 [2.12]               | 18.8 [0.997]                          | 18.1 [1.27]               | 22.3 [1.30]                    | 20.6 [1.27]               |
| Age       | 18 – 24                          | 19.5 [1.22]                             | 16.6 [0.808]              | 14.7 [5.41]                             | 18.6 [8.13]               | 17.4 [2.52]                           | 12.4 [1.98]               | 19.7 [1.14]                    | 14.6 [0.922]              |
|           | 25 – 34                          | 21.9 [1.26]                             | 18.3 [0.952]              | 18.1 [3.06]                             | 17.4 [2.70]               | 21.9 [3.71]                           | 16.6 [3.00]               | 25.1 [2.32]                    | 20.3 [2.19]               |
|           | 35 – 54                          | 22.9 [1.23]                             | 23.6 [1.18]               | 15.4 [1.57]                             | 17.2 [1.57]               | 19.0 [1.57]                           | 17.6 [1.59]               | 22.3 [2.53]                    | 20.6 [2.37]               |
|           | ≥55                              | 18.7 [1.03]                             | 23.8 [1.43]               | 19.7 [5.69]                             | 29.5 [9.64]               | 17.4 [1.99]                           | 22.0 [3.29]               | 21.9 [2.22]                    | 24.8 [2.55]               |
| Sex       | Male                             | 22.9 [0.930]                            | 19.7 [0.836]              | 15.2 [1.95]                             | 13.4 [2.16]               | 19.0 [1.06]                           | 18.1 [1.33]               | 23.7 [2.08]                    | 19.3 [2.08]               |
|           | Female                           | 19.3 [0.644]                            | 23.7 [0.942]              | 18.7 [2.73]                             | 26.5 [3.07]               | 15.0 [4.13]                           | 18.1 [6.55]               | 21.4 [1.58]                    | 21.4 [1.55]               |
| Race      | Non-Hispanic White               | 19.8 [0.652]                            | 22.7 [0.834]              | 16.4 [1.78]                             | 20.1 [2.34]               | 18.4 [1.10]                           | 17.8 [1.40]               | 24.6 [2.19]                    | 24.0 [2.33]               |
|           | Non-Hispanic Black               | 27.6 [2.21]                             | 19.2 [1.70]               | 33.9 [19.5]                             | 17.1 [8.65]               | 31.6 [11.1]                           | 23.7 [6.52]               | 18.0 [1.43]                    | 13.7 [1.20]               |
|           | Hispanic                         | 19.5 [1.35]                             | 16.9 [1.23]               | 19.6 [6.40]                             | 19.6 [3.84]               | 15.8 [3.56]                           | 18.3 [4.96]               | 19.4 [1.71]                    | 17.8 [1.51]               |
|           | Other Race/Multiracial Ethnicity | 22.4 [2.56]                             | 24.5 [2.44]               | 12.3 [1.62]                             | 16.8 [7.30]               | 20.1 [3.11]                           | 17.8 [2.52]               | 23.2 [3.43]                    | 21.5 [4.04]               |
| Education | <High School/GED                 | 21.4 [1.22]                             | 21.9 [1.08]               | 11.7 [1.28]                             | 11.1 [2.06]               | 20.2 [2.56]                           | 21.1 [3.61]               | 18.3 [1.75]                    | 17.1 [1.77]               |
|           | HS Diploma                       | 20.7 [0.915]                            | 20.4 [1.08]               | 17.4 [3.63]                             | 17.3 [4.05]               | 21.6 [2.90]                           | 20.5 [2.72]               | 23.7 [3.20]                    | 20.6 [2.90]               |
|           | <4y College or Associate Degree  | 21.8 [1.09]                             | 22.2 [1.10]               | 17.1 [1.87]                             | 22.1 [2.10]               | 16.1 [1.34]                           | 14.9 [1.25]               | 19.2 [1.32]                    | 17.0 [1.22]               |
|           | Bachelor/Advanced                | 18.7 [1.51]                             | 22.4 [1.41]               | 25.9 [8.40]                             | 37.0 [9.90]               | 16.2 [2.14]                           | 14.3 [2.31]               | 26.9 [2.51]                    | 27.2 [2.79]               |

† Estimate should be interpreted with caution because it has low statistical precision. It is based on a sample size of less than 50, or the coefficient of variation of the estimate is larger than 30%.

Table S22. Sample-weighted creatinine and non-creatinine ratioed percentiles (95% confidence interval) by tobacco user group for PATH Study Wave 1 (2013-2014): 2-Methylhippuric acid (2MHA).

| Percentile | Every Day Established<br>Combustible Users |                                 | Every Day Established<br>E-Cigarette Users |                                 | Every Day Established<br>Smokeless Users |                                 | Never Users                          |                                 |
|------------|--------------------------------------------|---------------------------------|--------------------------------------------|---------------------------------|------------------------------------------|---------------------------------|--------------------------------------|---------------------------------|
|            | Non-Creatinine<br>Ratioed<br>[ng/mL]       | Creatinine<br>Ratioed<br>[µg/g] | Non-Creatinine<br>Ratioed<br>[ng/mL]       | Creatinine<br>Ratioed<br>[µg/g] | Non-Creatinine<br>Ratioed<br>[ng/mL]     | Creatinine<br>Ratioed<br>[µg/g] | Non-Creatinine<br>Ratioed<br>[ng/mL] | Creatinine<br>Ratioed<br>[µg/g] |
| 5th        | 26.0 [21.5,30.5]                           | 29.4 [27.4,31.3]                | <LOD                                       | 4.54 [<LOD,9.11]                | <LOD                                     | 6.13 [4.49,7.78]                | <LOD                                 | 4.47 [3.88,5.06]                |
| 10th       | 36.9 [34.3,39.6]                           | 40.1 [35.9,44.3]                | 4.88 [1.37,8.40]                           | 9.09 [4.04,14.1]                | 7.95 [6.20,9.70]                         | 10.7 [7.52,13.8]                | 5.73 [4.74,6.73]                     | 5.74 [4.84,6.65]                |
| 25th       | 68.8 [62.4,75.1]                           | 74.0 [68.3,79.6]                | 14.3 [10.2,18.4]                           | 17.3 [11.4,23.3]                | 18.1 [15.1,21.1]                         | 17.4 [14.5,20.3]                | 11.9 [10.5,13.3]                     | 11.6 [10.1,13.1]                |
| 50th       | 119 [111,127]                              | 121 [113,129]                   | 27.8 [20.0,35.6]                           | 33.8 [26.3,41.2]                | 33.5 [28.7,38.3]                         | 29.1 [27.1,31.2]                | 23.6 [20.7,26.6]                     | 22.1 [20.7,23.5]                |
| 75th       | 196 [184,207]                              | 201 [185,217]                   | 62.9 [48.8,77.0]                           | 59.4 [46.9,71.9]                | 60.3 [47.9,72.7]                         | 62.4 [51.1,73.7]                | 43.6 [38.8,48.4]                     | 41.7 [35.7,47.7]                |
| 90th       | 318 [295,341]                              | 295 [273,318]                   | 104 [67.3,140]                             | 119 [72.3,166]                  | 139 [97.9,179]                           | 133 [97.6,168]                  | 90.8 [75.6,106]                      | 81.7 [69.3,94.1]                |
| 95th       | 410 [370,450]                              | 379 [359,399]                   | 138 [94.0,183]                             | 179 [96.6,262]                  | 306 [173,439]                            | 252 [74.0,431]                  | 135 [105,166]                        | 122 [96.0,147]                  |

<LOD]: Less than the limit of detection

Table S23. Sample-weighted creatinine and non-creatinine ratioed percentiles (95% confidence interval) by tobacco user group for PATH Study Wave 1 (2013-2014): 3-Methylhippuric acid + 4-Methylhippuric acid (34MH).

| Percentile | Every Day Established<br>Combustible Users |                                 | Every Day Established<br>E-Cigarette Users |                                 | Every Day Established<br>Smokeless Users |                                 | Never Users                          |                                 |
|------------|--------------------------------------------|---------------------------------|--------------------------------------------|---------------------------------|------------------------------------------|---------------------------------|--------------------------------------|---------------------------------|
|            | Non-Creatinine<br>Ratioed<br>[ng/mL]       | Creatinine<br>Ratioed<br>[µg/g] | Non-Creatinine<br>Ratioed<br>[ng/mL]       | Creatinine<br>Ratioed<br>[µg/g] | Non-Creatinine<br>Ratioed<br>[ng/mL]     | Creatinine<br>Ratioed<br>[µg/g] | Non-Creatinine<br>Ratioed<br>[ng/mL] | Creatinine<br>Ratioed<br>[µg/g] |
| 5th        | 146 [119,172]                              | 188 [156,220]                   | 30.9 [21.3,40.4]                           | 63.1 [46.7,79.6]                | 38.6 [30.9,46.3]                         | 54.8 [46.3,63.4]                | 36.6 [31.9,41.3]                     | 48.6 [46.4,50.8]                |
| 10th       | 228 [203,254]                              | 290 [247,333]                   | 39.2 [29.3,49.0]                           | 72.4 [59.0,85.8]                | 47.9 [39.9,55.8]                         | 69.7 [62.0,77.4]                | 49.4 [43.1,55.7]                     | 59.3 [53.7,64.9]                |
| 25th       | 416 [362,469]                              | 534 [501,567]                   | 76.6 [44.5,109]                            | 102 [84.9,120]                  | 87.8 [63.5,112]                          | 98.4 [90.6,106]                 | 86.7 [77.4,96.0]                     | 88.9 [83.3,94.5]                |
| 50th       | 806 [752,859]                              | 830 [786,875]                   | 169 [129,208]                              | 176 [142,209]                   | 178 [155,200]                            | 156 [139,172]                   | 156 [142,171]                        | 134 [124,145]                   |
| 75th       | 1.38E+03<br>[1.30E+03,1.46E+03]            | 1.30E+03<br>[1.22E+03,1.39E+03] | 342 [202,481]                              | 309 [276,342]                   | 334 [287,381]                            | 299 [250,349]                   | 269 [234,304]                        | 227 [203,250]                   |
| 90th       | 2.28E+03<br>[2.17E+03,2.39E+03]            | 1.80E+03<br>[1.70E+03,1.89E+03] | 611 [451,772]                              | 564 [297,831]                   | 827<br>[564,1.09E+03]                    | 564 [452,676]                   | 506 [422,590]                        | 419 [321,517]                   |
| 95th       | 3.14E+03<br>[2.88E+03,3.40E+03]            | 2.16E+03<br>[1.99E+03,2.33E+03] | 1.14E+03<br>[444,1.83E+03]                 | 980 [727,1.23E+03]              | 1.27E+03<br>[701,1.84E+03]               | 1.01E+03<br>[175,1.84E+03]      | 846<br>[631,1.06E+03]                | 735 [519,952]                   |

Table S24. Sample-weighted creatinine and non-creatinine ratioed percentiles (95% confidence interval) by tobacco user group for PATH Study Wave 1 (2013-2014): *N*-acetyl-S-(2-carbamoylethyl)- L-cysteine (2CAEMA).

| Percentile | Every Day Established<br>Combustible Users |                                 | Every Day Established<br>E-Cigarette Users |                                 | Every Day Established<br>Smokeless Users |                                 | Never Users                          |                                 |
|------------|--------------------------------------------|---------------------------------|--------------------------------------------|---------------------------------|------------------------------------------|---------------------------------|--------------------------------------|---------------------------------|
|            | Non-Creatinine<br>Ratioed<br>[ng/mL]       | Creatinine<br>Ratioed<br>[µg/g] | Non-Creatinine<br>Ratioed<br>[ng/mL]       | Creatinine<br>Ratioed<br>[µg/g] | Non-Creatinine<br>Ratioed<br>[ng/mL]     | Creatinine<br>Ratioed<br>[µg/g] | Non-Creatinine<br>Ratioed<br>[ng/mL] | Creatinine<br>Ratioed<br>[µg/g] |
| 5th        | 34.8 [32.0,37.6]                           | 56.5 [54.2,58.9]                | 10.1 [5.57,14.7]                           | 24.4 [18.6,30.2]                | 12.2 [8.79,15.6]                         | 18.0 [14.4,21.5]                | 10.5 [7.71,13.3]                     | 18.0 [16.4,19.6]                |
| 10th       | 47.4 [43.6,51.2]                           | 70.1 [66.4,73.8]                | 16.2 [11.0,21.3]                           | 28.7 [25.4,32.0]                | 17.5 [13.5,21.5]                         | 24.1 [20.5,27.7]                | 16.1 [13.6,18.5]                     | 20.3 [18.3,22.3]                |
| 25th       | 84.8 [77.1,92.4]                           | 102 [98.5,106]                  | 27.1 [23.1,31.2]                           | 38.6 [33.7,43.6]                | 31.0 [29.7,32.4]                         | 33.8 [30.3,37.2]                | 30.4 [27.6,33.2]                     | 30.9 [28.3,33.6]                |
| 50th       | 154 [147,162]                              | 151 [144,157]                   | 53.1 [44.5,61.6]                           | 55.4 [49.7,61.0]                | 49.1 [45.5,52.8]                         | 47.2 [42.9,51.6]                | 48.8 [44.6,53.1]                     | 44.2 [41.5,47.0]                |
| 75th       | 266 [243,289]                              | 228 [213,242]                   | 102 [79.1,126]                             | 82.9 [52.1,114]                 | 78.2 [70.3,86.0]                         | 67.0 [62.3,71.7]                | 81.9 [74.3,89.5]                     | 66.2 [63.3,69.1]                |
| 90th       | 432 [399,465]                              | 325 [308,343]                   | 192 [141,243]                              | 138 [78.9,196]                  | 116 [99.6,133]                           | 85.7 [73.9,97.6]                | 127 [119,136]                        | 93.3 [83.7,103]                 |
| 95th       | 554 [516,593]                              | 403 [351,455]                   | 270 [194,345]                              | 227 [8.93,446]                  | 168 [138,197]                            | 114 [89.8,137]                  | 173 [162,184]                        | 125 [112,138]                   |



Table S25. Sample-weighted creatinine and non-creatinine ratioed percentiles (95% confidence interval) by tobacco user group for PATH Study Wave 1 (2013-2014): *N*-acetyl-S-(*N*-methylcarbamoyl)- L-cysteine (MCAMA).

| Percentile | Every Day Established<br>Combustible Users |                                 | Every Day Established<br>E-Cigarette Users |                                 | Every Day Established<br>Smokeless Users |                                 | Never Users                          |                                 |
|------------|--------------------------------------------|---------------------------------|--------------------------------------------|---------------------------------|------------------------------------------|---------------------------------|--------------------------------------|---------------------------------|
|            | Non-Creatinine<br>Ratioed<br>[ng/mL]       | Creatinine<br>Ratioed<br>[µg/g] | Non-Creatinine<br>Ratioed<br>[ng/mL]       | Creatinine<br>Ratioed<br>[µg/g] | Non-Creatinine<br>Ratioed<br>[ng/mL]     | Creatinine<br>Ratioed<br>[µg/g] | Non-Creatinine<br>Ratioed<br>[ng/mL] | Creatinine<br>Ratioed<br>[µg/g] |
| 5th        | 131 [120,142]                              | 162 [152,172]                   | 47.4 [28.4,66.4]                           | 62.9 [48.9,77.0]                | 32.2 [24.5,39.9]                         | 49.7 [37.9,61.6]                | 26.2 [21.3,31.1]                     | 31.5 [29.2,33.8]                |
| 10th       | 184 [168,200]                              | 218 [197,239]                   | 56.1 [43.6,68.6]                           | 80.4 [57.1,104]                 | 49.3 [39.7,59.0]                         | 64.1 [59.2,68.9]                | 37.0 [32.8,41.3]                     | 38.5 [35.0,41.9]                |
| 25th       | 318 [296,340]                              | 356 [336,377]                   | 89.0 [71.3,107]                            | 129 [98.0,160]                  | 84.7 [68.9,101]                          | 90.3 [83.6,97.1]                | 63.4 [56.9,69.9]                     | 59.7 [52.7,66.8]                |
| 50th       | 552 [518,586]                              | 559 [525,592]                   | 181 [138,225]                              | 194 [150,237]                   | 155 [136,173]                            | 132 [119,145]                   | 112 [100,123]                        | 104 [95.4,113]                  |
| 75th       | 928 [873,982]                              | 879 [815,943]                   | 365 [300,430]                              | 328 [283,374]                   | 230 [198,261]                            | 196 [168,224]                   | 194 [177,212]                        | 176 [162,190]                   |
| 90th       | 1.42E+03<br>[1.33E+03,1.50E+03]            | 1.32E+03<br>[1.21E+03,1.43E+03] | 482 [321,644]                              | 521 [416,626]                   | 326 [296,356]                            | 290 [233,347]                   | 316 [298,335]                        | 268 [240,296]                   |
| 95th       | 1.80E+03<br>[1.62E+03,1.99E+03]            | 1.55E+03<br>[1.50E+03,1.61E+03] | 668 [495,842]                              | 654 [481,826]                   | 387 [326,448]                            | 360 [313,407]                   | 425 [375,475]                        | 359 [327,390]                   |

Table S26. Sample-weighted creatinine and non-creatinine ratioed percentiles (95% confidence interval) by tobacco user group for PATH Study Wave 1 (2013-2014): *N*-acetyl-*S*-(benzyl)-*L*-cysteine (BZMA).

| Percentile | Every Day Established<br>Combustible Users |                                 | Every Day Established<br>E-Cigarette Users |                                 | Every Day Established<br>Smokeless Users |                                 | Never Users                          |                                 |
|------------|--------------------------------------------|---------------------------------|--------------------------------------------|---------------------------------|------------------------------------------|---------------------------------|--------------------------------------|---------------------------------|
|            | Non-Creatinine<br>Ratioed<br>[ng/mL]       | Creatinine<br>Ratioed<br>[µg/g] | Non-Creatinine<br>Ratioed<br>[ng/mL]       | Creatinine<br>Ratioed<br>[µg/g] | Non-Creatinine<br>Ratioed<br>[ng/mL]     | Creatinine<br>Ratioed<br>[µg/g] | Non-Creatinine<br>Ratioed<br>[ng/mL] | Creatinine<br>Ratioed<br>[µg/g] |
| 5th        | 1.29 [1.08,1.51]                           | 2.19 [2.05,2.33]                | 1.26 [0.684,1.85]                          | 2.03 [1.57,2.48]                | 1.34 [1.16,1.51]                         | 1.90 [1.53,2.27]                | 1.41 [1.23,1.58]                     | 1.98 [1.85,2.10]                |
| 10th       | 1.84 [1.65,2.04]                           | 2.69 [2.55,2.82]                | 1.84 [1.13,2.56]                           | 2.42 [1.86,2.99]                | 1.92 [1.62,2.22]                         | 2.36 [2.14,2.59]                | 2.07 [1.83,2.31]                     | 2.34 [2.12,2.56]                |
| 25th       | 3.30 [3.01,3.59]                           | 3.77 [3.57,3.98]                | 3.16 [2.29,4.03]                           | 4.05 [3.30,4.80]                | 3.08 [2.57,3.60]                         | 3.29 [2.99,3.60]                | 3.49 [3.08,3.91]                     | 3.45 [3.17,3.72]                |
| 50th       | 6.27 [5.94,6.60]                           | 5.88 [5.52,6.25]                | 5.85 [5.07,6.63]                           | 6.65 [5.39,7.91]                | 5.45 [4.88,6.01]                         | 5.29 [4.98,5.59]                | 6.18 [5.54,6.82]                     | 5.48 [5.13,5.84]                |
| 75th       | 11.7 [10.7,12.7]                           | 9.99 [9.07,10.9]                | 13.3 [9.03,17.6]                           | 11.7 [8.55,14.9]                | 9.98 [8.39,11.6]                         | 8.52 [8.15,8.89]                | 11.6 [10.3,12.9]                     | 9.81 [8.94,10.7]                |
| 90th       | 22.0 [19.6,24.4]                           | 18.0 [15.8,20.2]                | 22.3 [15.1,29.6]                           | 29.6 [17.5,41.7]                | 15.8 [14.2,17.4]                         | 14.2 [11.1,17.2]                | 21.0 [17.5,24.4]                     | 17.6 [14.7,20.5]                |
| 95th       | 34.3 [26.1,42.5]                           | 31.3 [23.5,39.1]                | 44.3 [9.82,78.9]                           | 37.4 [29.7,45.1]                | 20.4 [16.4,24.3]                         | 18.5 [12.5,24.5]                | 29.5 [26.3,32.8]                     | 25.5 [20.7,30.3]                |

Table S27. Sample-weighted creatinine and non-creatinine ratioed percentiles (95% confidence interval) by tobacco user group for PATH Study Wave 1 (2013-2014): *N*-acetyl-*S*-(2-carboxyethyl)-*L*-cysteine (2COEMA).

| Percentile | Every Day Established<br>Combustible Users |                                 | Every Day Established<br>E-Cigarette Users |                                 | Every Day Established<br>Smokeless Users |                                 | Never Users                          |                                 |
|------------|--------------------------------------------|---------------------------------|--------------------------------------------|---------------------------------|------------------------------------------|---------------------------------|--------------------------------------|---------------------------------|
|            | Non-Creatinine<br>Ratioed<br>[ng/mL]       | Creatinine<br>Ratioed<br>[µg/g] | Non-Creatinine<br>Ratioed<br>[ng/mL]       | Creatinine<br>Ratioed<br>[µg/g] | Non-Creatinine<br>Ratioed<br>[ng/mL]     | Creatinine<br>Ratioed<br>[µg/g] | Non-Creatinine<br>Ratioed<br>[ng/mL] | Creatinine<br>Ratioed<br>[µg/g] |
| 5th        | 56.3 [49.9,62.8]                           | 92.4 [83.5,101]                 | 17.7 [11.9,23.5]                           | 42.4 [32.9,51.8]                | 23.2 [18.3,28.0]                         | 36.8 [32.0,41.7]                | 23.2 [18.2,28.3]                     | 37.6 [34.2,40.9]                |
| 10th       | 91.2 [78.2,104]                            | 121 [112,131]                   | 26.4 [19.2,33.5]                           | 51.5 [35.9,67.0]                | 31.1 [23.2,38.9]                         | 44.4 [38.2,50.7]                | 33.3 [29.1,37.5]                     | 46.4 [42.4,50.3]                |
| 25th       | 168 [154,182]                              | 185 [174,195]                   | 47.2 [32.2,62.2]                           | 71.5 [57.9,85.1]                | 56.8 [45.1,68.5]                         | 62.9 [56.1,69.6]                | 63.2 [58.4,68.0]                     | 60.7 [57.5,64.0]                |
| 50th       | 320 [300,340]                              | 303 [289,317]                   | 109 [87.8,129]                             | 109 [91.6,127]                  | 95.4 [82.6,108]                          | 89.1 [80.3,97.8]                | 103 [94.6,112]                       | 91.2 [87.0,95.4]                |
| 75th       | 549 [514,583]                              | 488 [465,512]                   | 229 [168,289]                              | 168 [139,198]                   | 171 [139,202]                            | 138 [122,154]                   | 174 [160,188]                        | 134 [122,145]                   |
| 90th       | 856 [795,918]                              | 719 [654,783]                   | 325 [253,396]                              | 271 [203,339]                   | 287 [227,347]                            | 216 [163,270]                   | 280 [258,302]                        | 206 [189,223]                   |
| 95th       | 1.08E+03<br>[972,1.18E+03]                 | 871 [818,925]                   | 393 [165,620]                              | 299 [233,364]                   | 393 [314,472]                            | 314 [270,358]                   | 366 [328,404]                        | 271 [247,294]                   |

Table S28. Sample-weighted creatinine and non-creatinine ratioed percentiles (95% confidence interval) by tobacco user group for PATH Study Wave 1 (2013-2014): *N*-acetyl-S- (1-cyano-2-hydroxyethyl)-L-cysteine (1CYHEMA).

| Percentile | Every Day Established<br>Combustible Users |                                 | Every Day Established<br>E-Cigarette Users |                                 | Every Day Established<br>Smokeless Users |                                 | Never Users                          |                                 |
|------------|--------------------------------------------|---------------------------------|--------------------------------------------|---------------------------------|------------------------------------------|---------------------------------|--------------------------------------|---------------------------------|
|            | Non-Creatinine<br>Ratioed<br>[ng/mL]       | Creatinine<br>Ratioed<br>[µg/g] | Non-Creatinine<br>Ratioed<br>[ng/mL]       | Creatinine<br>Ratioed<br>[µg/g] | Non-Creatinine<br>Ratioed<br>[ng/mL]     | Creatinine<br>Ratioed<br>[µg/g] | Non-Creatinine<br>Ratioed<br>[ng/mL] | Creatinine<br>Ratioed<br>[µg/g] |
| 5th        | 2.97 [2.33,3.61]                           | 4.13 [3.25,5.01]                | <LOD                                       | 0.850 [0.749,0.951]             | <LOD                                     | 0.681 [0.611,0.752]             | <LOD                                 | 0.701 [0.633,0.769]             |
| 10th       | 5.36 [4.59,6.12]                           | 7.24 [6.31,8.17]                | <LOD                                       | 0.922 [0.763,1.08]              | <LOD                                     | 0.873 [0.802,0.944]             | <LOD                                 | 0.825 [0.780,0.870]             |
| 25th       | 14.2 [12.6,15.7]                           | 15.9 [14.2,17.5]                | <LOD                                       | 1.30 [1.09,1.51]                | <LOD                                     | 1.09 [0.959,1.22]               | <LOD                                 | 1.10 [1.04,1.16]                |
| 50th       | 31.2 [29.0,33.3]                           | 33.3 [30.8,35.8]                | <LOD                                       | 2.18 [1.84,2.52]                | <LOD                                     | 1.68 [1.53,1.83]                | <LOD                                 | 1.57 [1.47,1.67]                |
| 75th       | 62.1 [57.4,66.8]                           | 57.5 [53.9,61.1]                | <LOD                                       | 5.17 [3.67,6.67]                | <LOD                                     | 2.83 [2.36,3.30]                | <LOD                                 | 2.65 [2.37,2.94]                |
| 90th       | 104 [94.3,113]                             | 84.1 [79.9,88.3]                | 6.74 [<LOD,14.4]                           | 12.0 [7.12,16.9]                | <LOD                                     | 5.76 [4.26,7.26]                | <LOD                                 | 4.80 [3.84,5.77]                |
| 95th       | 144 [136,153]                              | 106 [96.2,116]                  | 20.3 [8.02,32.6]                           | 17.2 [-0.253,34.6]              | <LOD                                     | 9.21 [6.09,12.3]                | <LOD                                 | 6.86 [5.27,8.46]                |

<LOD]: Less than the limit of detection

Table S29. Sample-weighted creatinine and non-creatinine ratioed percentiles (95% confidence interval) by tobacco user group for PATH Study Wave 1 (2013-2014): *N*-acetyl-S-(2-cyanoethyl)-L-cysteine (2CYEMA).

| Percentile | Every Day Established<br>Combustible Users |                                 | Every Day Established<br>E-Cigarette Users |                                 | Every Day Established<br>Smokeless Users |                                 | Never Users                          |                                 |
|------------|--------------------------------------------|---------------------------------|--------------------------------------------|---------------------------------|------------------------------------------|---------------------------------|--------------------------------------|---------------------------------|
|            | Non-Creatinine<br>Ratioed<br>[ng/mL]       | Creatinine<br>Ratioed<br>[µg/g] | Non-Creatinine<br>Ratioed<br>[ng/mL]       | Creatinine<br>Ratioed<br>[µg/g] | Non-Creatinine<br>Ratioed<br>[ng/mL]     | Creatinine<br>Ratioed<br>[µg/g] | Non-Creatinine<br>Ratioed<br>[ng/mL] | Creatinine<br>Ratioed<br>[µg/g] |
| 5th        | 25.7 [17.8,33.7]                           | 32.1 [29.1,35.1]                | <LOD                                       | 0.932 [0.607,1.26]              | <LOD                                     | 0.451 [0.388,0.514]             | <LOD                                 | 0.403 [0.368,0.437]             |
| 10th       | 48.8 [43.7,53.9]                           | 58.6 [52.8,64.3]                | 0.636 [0.419,0.852]                        | 1.15 [1.02,1.29]                | <LOD                                     | 0.530 [0.470,0.591]             | <LOD                                 | 0.493 [0.458,0.527]             |
| 25th       | 102 [91.4,112]                             | 114 [104,124]                   | 1.12 [0.878,1.37]                          | 1.47 [1.29,1.65]                | 0.736 [0.535,0.938]                      | 0.817 [0.719,0.914]             | 0.718 [0.628,0.807]                  | 0.741 [0.687,0.794]             |
| 50th       | 189 [178,200]                              | 200 [186,215]                   | 2.38 [1.73,3.03]                           | 2.62 [1.90,3.33]                | 1.43 [1.14,1.72]                         | 1.33 [1.12,1.53]                | 1.21 [1.13,1.29]                     | 1.12 [1.04,1.19]                |
| 75th       | 322 [306,338]                              | 314 [293,335]                   | 9.62 [0.248,19.0]                          | 11.2 [4.52,17.9]                | 3.27 [2.71,3.82]                         | 2.71 [2.16,3.27]                | 2.14 [1.94,2.34]                     | 1.79 [1.63,1.94]                |
| 90th       | 516 [472,561]                              | 456 [431,482]                   | 45.0 [2.58,87.3]                           | 40.0 [-36.1,116]                | 8.85 [6.18,11.5]                         | 9.21 [5.50,12.9]                | 3.84 [3.40,4.29]                     | 3.14 [2.77,3.51]                |
| 95th       | 700 [642,759]                              | 594 [565,624]                   | 159 [46.7,272]                             | 117 [72.4,161]                  | 17.5 [11.7,23.3]                         | 18.0 [8.75,27.3]                | 5.69 [3.06,8.32]                     | 4.97 [3.53,6.41]                |

<LOD>: Less than the limit of detection

Table S30. Sample-weighted creatinine and non-creatinine ratioed percentiles (95% confidence interval) by tobacco user group for PATH Study Wave 1 (2013-2014): *N*-acetyl-*S*-(3,4-dihydroxybutyl)- *L*-cysteine (34HBMA).

| Percentile | Every Day Established<br>Combustible Users |                                 | Every Day Established<br>E-Cigarette Users |                                 | Every Day Established<br>Smokeless Users |                                 | Never Users                          |                                 |
|------------|--------------------------------------------|---------------------------------|--------------------------------------------|---------------------------------|------------------------------------------|---------------------------------|--------------------------------------|---------------------------------|
|            | Non-Creatinine<br>Ratioed<br>[ng/mL]       | Creatinine<br>Ratioed<br>[µg/g] | Non-Creatinine<br>Ratioed<br>[ng/mL]       | Creatinine<br>Ratioed<br>[µg/g] | Non-Creatinine<br>Ratioed<br>[ng/mL]     | Creatinine<br>Ratioed<br>[µg/g] | Non-Creatinine<br>Ratioed<br>[ng/mL] | Creatinine<br>Ratioed<br>[µg/g] |
| 5th        | 145 [131,160]                              | 269 [255,282]                   | 81.6 [56.0,107]                            | 224 [212,235]                   | 113 [101,126]                            | 206 [190,222]                   | 103 [87.3,119]                       | 192 [178,207]                   |
| 10th       | 193 [179,208]                              | 313 [300,325]                   | 99.0 [70.4,128]                            | 243 [221,265]                   | 157 [127,187]                            | 222 [207,237]                   | 146 [127,166]                        | 220 [211,229]                   |
| 25th       | 318 [292,344]                              | 388 [374,402]                   | 186 [117,255]                              | 298 [261,336]                   | 249 [227,271]                            | 281 [265,296]                   | 271 [250,291]                        | 267 [258,276]                   |
| 50th       | 550 [523,577]                              | 515 [495,534]                   | 376 [314,437]                              | 373 [355,392]                   | 382 [349,415]                            | 356 [340,373]                   | 405 [381,430]                        | 350 [336,364]                   |
| 75th       | 809 [767,850]                              | 671 [650,693]                   | 577 [486,669]                              | 475 [453,498]                   | 580 [538,623]                            | 458 [410,507]                   | 594 [558,631]                        | 447 [422,472]                   |
| 90th       | 1.14E+03<br>[1.08E+03,1.19<br>E+03]        | 862 [838,885]                   | 833 [705,961]                              | 624 [545,702]                   | 764 [681,847]                            | 556 [504,609]                   | 785 [714,857]                        | 551 [515,587]                   |
| 95th       | 1.36E+03<br>[1.27E+03,1.45<br>E+03]        | 1.03E+03<br>[970,1.09E+03]      | 944 [745,1.14E+03]                         | 667 [627,707]                   | 900 [681,1.12E+03]                       | 676 [585,767]                   | 989 [907,1.07E+03]                   | 632 [580,685]                   |

Table S31. Sample-weighted creatinine and non-creatinine ratioed percentiles (95% confidence interval) by tobacco user group for PATH Study Wave 1 (2013-2014): *N*-acetyl-S-(2-carbamoyl-2-hydroxyethyl)-L-cysteine (2CAHEMA).

| Percentile | Every Day Established<br>Combustible Users |                                 | Every Day Established<br>E-Cigarette Users |                                 | Every Day Established<br>Smokeless Users |                                 | Never Users                          |                                 |
|------------|--------------------------------------------|---------------------------------|--------------------------------------------|---------------------------------|------------------------------------------|---------------------------------|--------------------------------------|---------------------------------|
|            | Non-Creatinine<br>Ratioed<br>[ng/mL]       | Creatinine<br>Ratioed<br>[µg/g] | Non-Creatinine<br>Ratioed<br>[ng/mL]       | Creatinine<br>Ratioed<br>[µg/g] | Non-Creatinine<br>Ratioed<br>[ng/mL]     | Creatinine<br>Ratioed<br>[µg/g] | Non-Creatinine<br>Ratioed<br>[ng/mL] | Creatinine<br>Ratioed<br>[µg/g] |
| 5th        | <LOD]                                      | 6.83 [6.24,7.42]                | <LOD]                                      | 4.04 [3.41,4.67]                | <LOD]                                    | 3.83 [3.34,4.32]                | <LOD]                                | 3.57 [3.25,3.88]                |
| 10th       | <LOD]                                      | 9.01 [8.41,9.61]                | <LOD]                                      | 4.77 [4.01,5.53]                | <LOD]                                    | 4.55 [3.99,5.11]                | <LOD]                                | 4.11 [3.81,4.40]                |
| 25th       | 9.78 [8.98,10.6]                           | 13.2 [12.7,13.8]                | <LOD]                                      | 6.91 [5.85,7.97]                | <LOD]                                    | 5.49 [4.93,6.05]                | <LOD]                                | 5.63 [5.28,5.98]                |
| 50th       | 18.9 [17.8,19.9]                           | 19.1 [18.5,19.7]                | <LOD]                                      | 10.2 [8.65,11.7]                | <LOD]                                    | 8.09 [7.18,9.00]                | <LOD]                                | 8.34 [7.77,8.92]                |
| 75th       | 31.4 [30.0,32.9]                           | 27.1 [25.6,28.7]                | 13.8 [12.3,15.3]                           | 17.9 [15.5,20.4]                | 11.9 [10.9,12.9]                         | 12.0 [10.4,13.5]                | 12.1 [11.6,12.6]                     | 12.2 [11.2,13.2]                |
| 90th       | 50.7 [48.0,53.4]                           | 38.5 [37.0,40.0]                | 21.8 [14.1,29.4]                           | 32.2 [18.4,45.9]                | 16.4 [14.5,18.2]                         | 19.1 [17.1,21.1]                | 18.5 [16.4,20.5]                     | 19.2 [16.7,21.7]                |
| 95th       | 66.1 [61.8,70.4]                           | 47.4 [43.5,51.2]                | 36.1 [21.4,50.9]                           | 47.2 [27.0,67.4]                | 19.3 [15.3,23.3]                         | 26.0 [19.9,32.1]                | 25.6 [23.1,28.1]                     | 24.8 [20.0,29.6]                |

<LOD]: less than the limit of detection

Table S32. Sample-weighted creatinine and non-creatinine ratioed percentiles (95% confidence interval) by tobacco user group for PATH Study Wave 1 (2013-2014): *N*-acetyl-S-(2-hydroxyethyl)-L-cysteine (2HEMA).

| Percentile | Every Day Established<br>Combustible Users |                                 | Every Day Established<br>E-Cigarette Users |                                 | Every Day Established<br>Smokeless Users |                                 | Never Users                          |                                 |
|------------|--------------------------------------------|---------------------------------|--------------------------------------------|---------------------------------|------------------------------------------|---------------------------------|--------------------------------------|---------------------------------|
|            | Non-Creatinine<br>Ratioed<br>[ng/mL]       | Creatinine<br>Ratioed<br>[µg/g] | Non-Creatinine<br>Ratioed<br>[ng/mL]       | Creatinine<br>Ratioed<br>[µg/g] | Non-Creatinine<br>Ratioed<br>[ng/mL]     | Creatinine<br>Ratioed<br>[µg/g] | Non-Creatinine<br>Ratioed<br>[ng/mL] | Creatinine<br>Ratioed<br>[µg/g] |
| 5th        | <LOD]                                      | 0.634 [0.519,0.750]             | <LOD]                                      | 0.310 [0.236,0.384]             | <LOD]                                    | 0.296 [0.276,0.315]             | <LOD]                                | 0.293 [0.268,0.319]             |
| 10th       | <LOD]                                      | 0.884 [0.781,0.987]             | <LOD]                                      | 0.360 [0.285,0.435]             | <LOD]                                    | 0.353 [0.316,0.391]             | <LOD]                                | 0.375 [0.345,0.404]             |
| 25th       | 1.51 [1.35,1.67]                           | 1.68 [1.53,1.84]                | <LOD]                                      | 0.666 [0.515,0.817]             | <LOD]                                    | 0.530 [0.479,0.581]             | <LOD]                                | 0.537 [0.490,0.585]             |
| 50th       | 2.94 [2.71,3.17]                           | 3.15 [3.01,3.28]                | <LOD]                                      | 1.10 [0.903,1.31]               | <LOD]                                    | 0.888 [0.751,1.02]              | 0.849 [0.770,0.927]                  | 0.902 [0.831,0.974]             |
| 75th       | 6.19 [5.56,6.82]                           | 5.78 [5.31,6.25]                | 1.47 [1.17,1.76]                           | 1.77 [1.53,2.02]                | 1.34 [1.23,1.44]                         | 1.37 [1.15,1.59]                | 1.63 [1.45,1.81]                     | 1.54 [1.31,1.78]                |
| 90th       | 11.1 [10.2,12.1]                           | 10.7 [9.59,11.8]                | 2.44 [1.85,3.03]                           | 3.09 [2.00,4.17]                | 2.14 [1.88,2.40]                         | 2.24 [1.89,2.58]                | 3.06 [2.61,3.51]                     | 2.70 [2.23,3.17]                |
| 95th       | 17.2 [14.9,19.5]                           | 14.7 [13.1,16.2]                | 3.21 [1.25,5.17]                           | 4.16 [3.24,5.08]                | 2.64 [2.28,3.01]                         | 2.88 [2.52,3.24]                | 4.48 [3.36,5.60]                     | 4.03 [2.77,5.30]                |

<LOD]: less than the limit of detection



Table S33. Sample-weighted creatinine and non-creatinine ratioed percentiles (95% confidence interval) by tobacco user group for PATH Study Wave 1 (2013-2014): *N*-acetyl-S-(2-hydroxypropyl)-L-cysteine (2HPMA).

| Percentile | Every Day Established<br>Combustible Users |                                 | Every Day Established<br>E-Cigarette Users |                                 | Every Day Established<br>Smokeless Users |                                 | Never Users                          |                                 |
|------------|--------------------------------------------|---------------------------------|--------------------------------------------|---------------------------------|------------------------------------------|---------------------------------|--------------------------------------|---------------------------------|
|            | Non-Creatinine<br>Ratioed<br>[ng/mL]       | Creatinine<br>Ratioed<br>[µg/g] | Non-Creatinine<br>Ratioed<br>[ng/mL]       | Creatinine<br>Ratioed<br>[µg/g] | Non-Creatinine<br>Ratioed<br>[ng/mL]     | Creatinine<br>Ratioed<br>[µg/g] | Non-Creatinine<br>Ratioed<br>[ng/mL] | Creatinine<br>Ratioed<br>[µg/g] |
| 5th        | 16.5 [14.2,18.8]                           | 23.5 [20.8,26.3]                | <LOD                                       | 12.7 [10.3,15.1]                | 5.64 [2.47,8.82]                         | 10.2 [8.08,12.3]                | 7.39 [6.30,8.48]                     | 10.7 [10.0,11.5]                |
| 10th       | 23.6 [20.6,26.7]                           | 30.4 [27.6,33.1]                | 8.84 [4.99,12.7]                           | 14.4 [12.7,16.2]                | 8.78 [6.79,10.8]                         | 11.8 [10.9,12.6]                | 10.8 [9.38,12.2]                     | 12.6 [11.6,13.6]                |
| 25th       | 42.3 [38.9,45.7]                           | 49.8 [47.1,52.5]                | 16.9 [13.5,20.3]                           | 22.2 [18.6,25.8]                | 15.0 [13.6,16.4]                         | 16.3 [15.1,17.5]                | 16.8 [14.6,18.9]                     | 17.2 [16.6,17.9]                |
| 50th       | 81.4 [76.0,86.8]                           | 81.2 [77.6,84.9]                | 36.0 [27.5,44.5]                           | 36.1 [28.1,44.1]                | 26.8 [23.2,30.4]                         | 22.9 [20.0,25.8]                | 29.9 [28.1,31.7]                     | 24.8 [23.6,26.1]                |
| 75th       | 146 [136,155]                              | 128 [118,139]                   | 63.5 [46.9,80.1]                           | 55.5 [48.0,63.1]                | 47.3 [39.2,55.3]                         | 40.8 [35.5,46.1]                | 53.2 [48.0,58.4]                     | 42.7 [36.6,48.8]                |
| 90th       | 240 [217,262]                              | 202 [185,220]                   | 119 [85.6,152]                             | 143 [53.1,232]                  | 86.0 [69.5,102]                          | 68.8 [58.1,79.5]                | 105 [81.2,129]                       | 103 [67.5,139]                  |
| 95th       | 306 [263,348]                              | 258 [233,284]                   | 174 [33.2,315]                             | 200 [112,289]                   | 141 [52.2,231]                           | 127 [7.49,247]                  | 232 [140,324]                        | 198 [83.2,313]                  |

<LOD>: Less than the limit of detection

Table S34. Sample-weighted creatinine and non-creatinine ratioed percentiles (95% confidence interval) by tobacco user group for PATH Study Wave 1 (2013-2014): *N*-acetyl-S-(3-hydroxypropyl)-L-cysteine (3HPMA).

| Percentile | Every Day Established<br>Combustible Users |                                 | Every Day Established<br>E-Cigarette Users |                                 | Every Day Established<br>Smokeless Users |                                 | Never Users                          |                                 |
|------------|--------------------------------------------|---------------------------------|--------------------------------------------|---------------------------------|------------------------------------------|---------------------------------|--------------------------------------|---------------------------------|
|            | Non-Creatinine<br>Ratioed<br>[ng/mL]       | Creatinine<br>Ratioed<br>[µg/g] | Non-Creatinine<br>Ratioed<br>[ng/mL]       | Creatinine<br>Ratioed<br>[µg/g] | Non-Creatinine<br>Ratioed<br>[ng/mL]     | Creatinine<br>Ratioed<br>[µg/g] | Non-Creatinine<br>Ratioed<br>[ng/mL] | Creatinine<br>Ratioed<br>[µg/g] |
| 5th        | 261 [227,296]                              | 295 [246,343]                   | 39.2 [<LOD,82.6]                           | 126 [99.2,154]                  | 65.1 [55.8,74.4]                         | 100 [88.7,112]                  | 63.6 [54.6,72.5]                     | 89.7 [83.9,95.4]                |
| 10th       | 403 [359,446]                              | 472 [427,518]                   | 81.9 [64.5,99.2]                           | 148 [121,175]                   | 82.0 [68.1,96.0]                         | 113 [96.8,129]                  | 93.8 [74.1,114]                      | 109 [101,117]                   |
| 25th       | 769 [719,819]                              | 828 [753,902]                   | 149 [105,193]                              | 218 [185,252]                   | 153 [139,167]                            | 165 [145,184]                   | 163 [148,177]                        | 161 [150,173]                   |
| 50th       | 1.38E+03<br>[1.30E+03,1.46<br>E+03]        | 1.38E+03<br>[1.30E+03,1.46E+03] | 319 [227,411]                              | 333 [289,376]                   | 240 [208,271]                            | 225 [203,247]                   | 270 [246,293]                        | 250 [234,266]                   |
| 75th       | 2.34E+03<br>[2.23E+03,2.44<br>E+03]        | 2.35E+03<br>[2.18E+03,2.52E+03] | 664 [514,813]                              | 531 [451,612]                   | 431 [389,474]                            | 348 [315,381]                   | 480 [426,533]                        | 403 [353,453]                   |
| 90th       | 3.80E+03<br>[3.50E+03,4.09<br>E+03]        | 3.34E+03<br>[3.14E+03,3.55E+03] | 1.11E+03<br>[777,1.45E+03]                 | 809<br>[612,1.01E+03]           | 701 [497,906]                            | 597 [463,732]                   | 872 [796,947]                        | 689 [578,800]                   |
| 95th       | 4.94E+03<br>[4.45E+03,5.43<br>E+03]        | 4.35E+03<br>[4.01E+03,4.69E+03] | 1.54E+03<br>[1.17E+03,1.91E+<br>03]        | 1.16E+03<br>[631,1.68E+03]      | 1.17E+03<br>[950,1.39E+03]               | 810 [627,993]                   | 1.17E+03<br>[967,1.37E+03]           | 995 [878,1.11E+03]              |

[<LOD]: Less than the limit of detection

Table S35. Sample-weighted creatinine and non-creatinine ratioed percentiles (95% confidence interval) by tobacco user group for PATH Study Wave 1 (2013-2014): *N*-acetyl-S-(3-hydroxypropyl-1-methyl)-L-cysteine (3HMPMA).

| Percentile | Every Day Established<br>Combustible Users |                                 | Every Day Established<br>E-Cigarette Users |                                 | Every Day Established<br>Smokeless Users |                                 | Never Users                          |                                 |
|------------|--------------------------------------------|---------------------------------|--------------------------------------------|---------------------------------|------------------------------------------|---------------------------------|--------------------------------------|---------------------------------|
|            | Non-Creatinine<br>Ratioed<br>[ng/mL]       | Creatinine<br>Ratioed<br>[µg/g] | Non-Creatinine<br>Ratioed<br>[ng/mL]       | Creatinine<br>Ratioed<br>[µg/g] | Non-Creatinine<br>Ratioed<br>[ng/mL]     | Creatinine<br>Ratioed<br>[µg/g] | Non-Creatinine<br>Ratioed<br>[ng/mL] | Creatinine<br>Ratioed<br>[µg/g] |
|            | 5th                                        | 578 [498,657]                   | 575 [470,679]                              | 71.8 [52.1,91.6]                | 196 [161,231]                            | 129 [103,155]                   | 198 [176,219]                        | 123 [99.6,147]                  |
| 10th       | 821 [720,921]                              | 900 [780,1.02E+03]              | 111 [67.3,155]                             | 248 [200,296]                   | 182 [148,216]                            | 224 [203,245]                   | 162 [130,194]                        | 223 [210,236]                   |
| 25th       | 1.56E+03<br>[1.44E+03,1.69E+03]            | 1.77E+03<br>[1.64E+03,1.90E+03] | 234 [172,297]                              | 305 [265,345]                   | 283 [254,311]                            | 295 [277,313]                   | 291 [262,319]                        | 290 [280,300]                   |
| 50th       | 2.96E+03<br>[2.78E+03,3.14E+03]            | 2.99E+03<br>[2.82E+03,3.17E+03] | 436 [339,533]                              | 407 [340,474]                   | 449 [388,509]                            | 416 [368,465]                   | 471 [445,497]                        | 396 [376,416]                   |
| 75th       | 4.93E+03<br>[4.57E+03,5.30E+03]            | 4.93E+03<br>[4.68E+03,5.18E+03] | 667 [548,785]                              | 608 [548,669]                   | 702 [648,757]                            | 603 [547,659]                   | 761 [676,847]                        | 606 [561,650]                   |
| 90th       | 7.70E+03<br>[7.18E+03,8.22E+03]            | 6.68E+03<br>[6.42E+03,6.95E+03] | 1.19E+03<br>[824,1.55E+03]                 | 933<br>[560,1.31E+03]           | 1.09E+03<br>[973,1.21E+03]               | 874 [763,985]                   | 1.22E+03<br>[1.01E+03,1.42E+03]      | 978 [802,1.16E+03]              |
| 95th       | 9.98E+03<br>[9.13E+03,1.08E+04]            | 8.23E+03<br>[7.49E+03,8.97E+03] | 1.57E+03<br>[1.16E+03,1.99E+03]            | 1.15E+03<br>[585,1.71E+03]      | 1.34E+03<br>[952,1.72E+03]               | 1.32E+03<br>[825,1.81E+03]      | 1.99E+03<br>[1.49E+03,2.49E+03]      | 1.69E+03<br>[1.17E+03,2.21E+03] |

Table S36. Sample-weighted creatinine and non-creatinine ratioed percentiles (95% confidence interval) by tobacco user group for PATH Study Wave 1 (2013-2014): *N*-acetyl-S-(4-hydroxy-2-methyl-2-buten-1-yl)-L-cysteine (4HMBEMA).

| Percentile | Every Day Established<br>Combustible Users |                                 | Every Day Established<br>E-Cigarette Users |                                 | Every Day Established<br>Smokeless Users |                                 | Never Users                          |                                 |
|------------|--------------------------------------------|---------------------------------|--------------------------------------------|---------------------------------|------------------------------------------|---------------------------------|--------------------------------------|---------------------------------|
|            | Non-Creatinine<br>Ratioed<br>[ng/mL]       | Creatinine<br>Ratioed<br>[µg/g] | Non-Creatinine<br>Ratioed<br>[ng/mL]       | Creatinine<br>Ratioed<br>[µg/g] | Non-Creatinine<br>Ratioed<br>[ng/mL]     | Creatinine<br>Ratioed<br>[µg/g] | Non-Creatinine<br>Ratioed<br>[ng/mL] | Creatinine<br>Ratioed<br>[µg/g] |
| 5th        | 5.45 [4.85,6.05]                           | 5.78 [4.73,6.83]                | <LOD                                       | 0.824 [0.614,1.03]              | <LOD                                     | 0.726 [0.530,0.922]             | <LOD                                 | 0.878 [0.741,1.02]              |
| 10th       | 9.70 [8.51,10.9]                           | 12.1 [10.5,13.6]                | <LOD                                       | 1.23 [0.758,1.70]               | <LOD                                     | 1.27 [0.914,1.62]               | 0.774 [0.608,0.939]                  | 1.13 [1.01,1.25]                |
| 25th       | 22.8 [21.1,24.6]                           | 26.7 [24.4,28.9]                | 1.35 [0.859,1.84]                          | 1.91 [1.40,2.42]                | 1.62 [1.02,2.23]                         | 1.97 [1.77,2.18]                | 1.83 [1.61,2.05]                     | 1.93 [1.77,2.08]                |
| 50th       | 47.5 [42.5,52.5]                           | 48.8 [44.8,52.8]                | 3.35 [2.18,4.52]                           | 3.55 [3.00,4.11]                | 3.56 [3.17,3.95]                         | 3.58 [2.97,4.19]                | 3.58 [3.22,3.95]                     | 3.22 [2.94,3.50]                |
| 75th       | 89.1 [81.0,97.2]                           | 81.6 [77.5,85.7]                | 6.78 [5.66,7.89]                           | 6.25 [4.79,7.71]                | 6.58 [5.56,7.61]                         | 5.79 [5.27,6.32]                | 6.43 [6.07,6.80]                     | 5.04 [4.55,5.54]                |
| 90th       | 143 [132,154]                              | 120 [111,128]                   | 13.5 [2.19,24.8]                           | 11.7 [5.74,17.6]                | 12.4 [9.18,15.6]                         | 8.92 [7.59,10.3]                | 11.1 [9.73,12.5]                     | 8.51 [7.54,9.48]                |
| 95th       | 187 [168,207]                              | 158 [141,176]                   | 25.8 [18.9,32.6]                           | 15.9 [12.6,19.2]                | 18.4 [15.3,21.5]                         | 11.8 [8.37,15.2]                | 17.6 [14.0,21.2]                     | 11.4 [9.11,13.7]                |

<LOD>: less than the limit of detection

Table S37. Sample-weighted creatinine and non-creatinine ratioed percentiles (95% confidence interval) by tobacco user group for PATH Study Wave 1 (2013-2014): Mandelic acid (MADA).

| Percentile | Every Day Established<br>Combustible Users |                                 | Every Day Established<br>E-Cigarette Users |                                 | Every Day Established<br>Smokeless Users |                                 | Never Users                          |                                 |
|------------|--------------------------------------------|---------------------------------|--------------------------------------------|---------------------------------|------------------------------------------|---------------------------------|--------------------------------------|---------------------------------|
|            | Non-Creatinine<br>Ratioed<br>[ng/mL]       | Creatinine<br>Ratioed<br>[µg/g] | Non-Creatinine<br>Ratioed<br>[ng/mL]       | Creatinine<br>Ratioed<br>[µg/g] | Non-Creatinine<br>Ratioed<br>[ng/mL]     | Creatinine<br>Ratioed<br>[µg/g] | Non-Creatinine<br>Ratioed<br>[ng/mL] | Creatinine<br>Ratioed<br>[µg/g] |
| 5th        | 70.9 [61.4,80.5]                           | 114 [108,121]                   | 18.6 [3.34,33.9]                           | 62.9 [47.0,78.7]                | 36.3 [25.8,46.7]                         | 53.7 [44.0,63.4]                | 33.3 [24.5,42.1]                     | 55.0 [51.3,58.6]                |
| 10th       | 100 [87.1,113]                             | 142 [135,150]                   | 35.6 [20.6,50.7]                           | 74.2 [54.3,94.1]                | 55.7 [48.0,63.3]                         | 70.7 [60.6,80.8]                | 52.4 [43.5,61.3]                     | 67.8 [63.8,71.8]                |
| 25th       | 176 [165,186]                              | 209 [201,216]                   | 74.1 [58.9,89.3]                           | 103 [89.0,117]                  | 94.9 [81.5,108]                          | 97.4 [89.1,106]                 | 91.7 [79.8,104]                      | 90.7 [86.0,95.4]                |
| 50th       | 312 [291,333]                              | 300 [285,315]                   | 137 [109,165]                              | 136 [124,147]                   | 142 [121,163]                            | 134 [123,145]                   | 146 [136,156]                        | 129 [121,137]                   |
| 75th       | 510 [477,543]                              | 439 [404,474]                   | 224 [188,260]                              | 192 [164,219]                   | 234 [196,272]                            | 195 [180,211]                   | 222 [210,233]                        | 183 [170,195]                   |
| 90th       | 786 [733,839]                              | 599 [560,638]                   | 329 [283,375]                              | 253 [179,328]                   | 306 [283,329]                            | 265 [227,303]                   | 337 [302,371]                        | 243 [222,263]                   |
| 95th       | 1.01E+03<br>[868,1.15E+03]                 | 749 [692,805]                   | 407 [316,497]                              | 349 [242,457]                   | 396 [304,489]                            | 342 [225,458]                   | 429 [374,485]                        | 294 [269,319]                   |

Table S38. Sample-weighted creatinine and non-creatinine ratioed percentiles (95% confidence interval) by tobacco user group for PATH Study Wave 1 (2013-2014): *N*-acetyl-*S*-(4-hydroxy-2-buten-1-yl)-*L*-cysteine (t4HBEMA).

| Percentile | Every Day Established<br>Combustible Users |                                 | Every Day Established<br>E-Cigarette Users |                                 | Every Day Established<br>Smokeless Users |                                 | Never Users                          |                                 |
|------------|--------------------------------------------|---------------------------------|--------------------------------------------|---------------------------------|------------------------------------------|---------------------------------|--------------------------------------|---------------------------------|
|            | Non-Creatinine<br>Ratioed<br>[ng/mL]       | Creatinine<br>Ratioed<br>[µg/g] | Non-Creatinine<br>Ratioed<br>[ng/mL]       | Creatinine<br>Ratioed<br>[µg/g] | Non-Creatinine<br>Ratioed<br>[ng/mL]     | Creatinine<br>Ratioed<br>[µg/g] | Non-Creatinine<br>Ratioed<br>[ng/mL] | Creatinine<br>Ratioed<br>[µg/g] |
| 5th        | 6.20 [5.41,6.99]                           | 7.56 [6.15,8.96]                | 0.902 [0.500,1.30]                         | 1.77 [1.39,2.15]                | 1.43 [1.12,1.74]                         | 1.83 [1.56,2.10]                | 1.19 [1.01,1.37]                     | 1.74 [1.56,1.93]                |
| 10th       | 9.45 [8.44,10.5]                           | 12.1 [11.0,13.2]                | 1.20 [0.936,1.47]                          | 2.14 [1.88,2.39]                | 1.65 [1.52,1.79]                         | 2.13 [1.93,2.33]                | 1.67 [1.54,1.81]                     | 2.14 [2.02,2.27]                |
| 25th       | 18.5 [17.1,19.8]                           | 21.9 [20.6,23.2]                | 2.35 [1.72,2.99]                           | 2.85 [2.55,3.15]                | 2.62 [2.13,3.10]                         | 2.92 [2.64,3.20]                | 2.97 [2.68,3.25]                     | 2.95 [2.82,3.09]                |
| 50th       | 34.3 [32.3,36.4]                           | 34.4 [32.7,36.2]                | 4.04 [3.16,4.91]                           | 4.07 [3.53,4.61]                | 4.31 [3.66,4.95]                         | 4.09 [3.68,4.50]                | 4.84 [4.41,5.26]                     | 4.25 [3.99,4.52]                |
| 75th       | 61.0 [57.6,64.3]                           | 55.5 [52.6,58.5]                | 7.00 [5.59,8.42]                           | 6.98 [5.85,8.11]                | 7.58 [6.79,8.36]                         | 6.27 [5.77,6.77]                | 7.82 [7.25,8.40]                     | 6.22 [5.87,6.58]                |
| 90th       | 92.5 [87.9,97.1]                           | 79.5 [75.8,83.3]                | 11.9 [7.29,16.5]                           | 9.99 [7.82,12.2]                | 12.0 [11.1,13.0]                         | 9.92 [8.21,11.6]                | 12.1 [10.9,13.4]                     | 10.0 [8.66,11.4]                |
| 95th       | 123 [115,132]                              | 96.3 [87.1,106]                 | 20.3 [13.0,27.6]                           | 13.4 [8.62,18.1]                | 16.5 [14.2,18.8]                         | 12.3 [8.18,16.5]                | 15.6 [14.2,16.9]                     | 12.0 [10.9,13.0]                |

Table S39. Sample-weighted creatinine and non-creatinine ratioed percentiles (95% confidence interval) by tobacco user group for PATH Study Wave 1 (2013-2014): Phenylglyoxylic acid (PHGA).

| Percentile | Every Day Established<br>Combustible Users |                                 | Every Day Established<br>E-Cigarette Users |                                 | Every Day Established<br>Smokeless Users |                              | Never Users                          |                                 |
|------------|--------------------------------------------|---------------------------------|--------------------------------------------|---------------------------------|------------------------------------------|------------------------------|--------------------------------------|---------------------------------|
|            | Non-Creatinine<br>Ratioed<br>[ng/mL]       | Creatinine<br>Ratioed<br>[µg/g] | Non-Creatinine<br>Ratioed<br>[ng/mL]       | Creatinine<br>Ratioed<br>[µg/g] | Non-Creatinine<br>Ratioed<br>[ng/mL]     | Creatinine Ratioed<br>[µg/g] | Non-Creatinine<br>Ratioed<br>[ng/mL] | Creatinine<br>Ratioed<br>[µg/g] |
| 5th        | 101 [94.1,108]                             | 155 [147,164]                   | 38.5 [10.6,66.3]                           | 103 [63.9,142]                  | 66.4 [45.8,87.0]                         | 98.4 [84.5,112]              | 56.9 [48.4,65.4]                     | 92.6 [80.5,105]                 |
| 10th       | 138 [122,154]                              | 200 [187,213]                   | 70.3 [56.1,84.6]                           | 120 [108,133]                   | 87.6 [76.1,99.0]                         | 121 [104,137]                | 86.3 [75.8,96.7]                     | 116 [108,124]                   |
| 25th       | 235 [216,254]                              | 288 [276,299]                   | 110 [66.4,154]                             | 149 [130,168]                   | 147 [138,156]                            | 160 [150,171]                | 149 [136,161]                        | 149 [139,158]                   |
| 50th       | 435 [406,465]                              | 412 [398,425]                   | 198 [156,240]                              | 222 [200,245]                   | 225 [190,260]                            | 209 [200,218]                | 231 [209,253]                        | 203 [195,211]                   |
| 75th       | 672 [632,712]                              | 569 [543,596]                   | 323 [264,382]                              | 298 [259,336]                   | 351 [309,392]                            | 297 [276,318]                | 336 [315,357]                        | 275 [261,290]                   |
| 90th       | 975 [918,1.03E+03]                         | 780 [735,826]                   | 491 [394,587]                              | 420 [378,461]                   | 514 [445,583]                            | 409 [369,450]                | 482 [443,520]                        | 351 [329,374]                   |
| 95th       | 1.27E+03<br>[1.18E+03,1.36E+03]            | 912 [855,969]                   | 564 [485,643]                              | 499 [194,805]                   | 630 [525,735]                            | 458 [396,519]                | 585 [519,651]                        | 433 [376,491]                   |

Table S40. Sample-weighted creatinine and non-creatinine ratioed percentiles (95% confidence interval) by tobacco user group for PATH Study Wave 1 (2013-2014): *N*-acetyl-*S*-(phenyl)-*L*-cysteine (PHMA).

| Percentile | Every Day Established<br>Combustible Users |                                 | Every Day Established<br>E-Cigarette Users |                                 | Every Day Established<br>Smokeless Users |                                 | Never Users                          |                                 |
|------------|--------------------------------------------|---------------------------------|--------------------------------------------|---------------------------------|------------------------------------------|---------------------------------|--------------------------------------|---------------------------------|
|            | Non-Creatinine<br>Ratioed<br>[ng/mL]       | Creatinine<br>Ratioed<br>[µg/g] | Non-Creatinine<br>Ratioed<br>[ng/mL]       | Creatinine<br>Ratioed<br>[µg/g] | Non-Creatinine<br>Ratioed<br>[ng/mL]     | Creatinine<br>Ratioed<br>[µg/g] | Non-Creatinine<br>Ratioed<br>[ng/mL] | Creatinine<br>Ratioed<br>[µg/g] |
| 5th        | <LOD]                                      | 0.321 [0.281,0.361]             | <LOD]                                      | 0.250 [0.173,0.328]             | <LOD]                                    | 0.296 [0.225,0.368]             | <LOD]                                | 0.272 [0.252,0.293]             |
| 10th       | <LOD]                                      | 0.415 [0.377,0.454]             | <LOD]                                      | 0.342 [0.180,0.503]             | <LOD]                                    | 0.378 [0.351,0.405]             | <LOD]                                | 0.354 [0.316,0.391]             |
| 25th       | <LOD]                                      | 0.649 [0.608,0.691]             | <LOD]                                      | 0.657 [0.549,0.765]             | <LOD]                                    | 0.522 [0.452,0.591]             | <LOD]                                | 0.554 [0.496,0.612]             |
| 50th       | 0.982 [0.907,1.06]                         | 1.08 [1.02,1.14]                | 0.798 [0.587,1.01]                         | 1.02 [0.865,1.17]               | 0.901 [0.723,1.08]                       | 0.907 [0.778,1.04]              | 1.00 [0.908,1.10]                    | 0.993 [0.906,1.08]              |
| 75th       | 1.77 [1.63,1.91]                           | 1.74 [1.62,1.85]                | 1.55 [1.26,1.85]                           | 1.80 [1.35,2.24]                | 1.70 [1.42,1.98]                         | 1.62 [1.40,1.84]                | 1.94 [1.70,2.17]                     | 1.77 [1.56,1.97]                |
| 90th       | 3.10 [2.77,3.43]                           | 2.58 [2.42,2.75]                | 2.74 [2.41,3.08]                           | 2.73 [2.21,3.26]                | 3.28 [2.79,3.77]                         | 2.71 [2.10,3.32]                | 3.45 [3.17,3.74]                     | 3.03 [2.77,3.29]                |
| 95th       | 4.47 [3.57,5.37]                           | 3.42 [3.13,3.70]                | 3.90 [2.68,5.12]                           | 3.28 [2.57,3.99]                | 4.31 [3.74,4.89]                         | 3.59 [3.04,4.14]                | 4.41 [3.84,4.98]                     | 3.93 [3.39,4.47]                |

<LOD]: less than the limit of detection



Table S41. Sample-weighted creatinine and non-creatinine ratioed percentiles (95% confidence interval) by tobacco user group for PATH Study Wave 1 (2013-2014): 2-thioxothiazolidine-4-carboxylic acid (TTCA).

| Percentile | Every Day Established<br>Combustible Users |                                 | Every Day Established<br>E-Cigarette Users |                                 | Every Day Established<br>Smokeless Users |                                 | Never Users                          |                                 |
|------------|--------------------------------------------|---------------------------------|--------------------------------------------|---------------------------------|------------------------------------------|---------------------------------|--------------------------------------|---------------------------------|
|            | Non-Creatinine<br>Ratioed<br>[ng/mL]       | Creatinine<br>Ratioed<br>[µg/g] | Non-Creatinine<br>Ratioed<br>[ng/mL]       | Creatinine<br>Ratioed<br>[µg/g] | Non-Creatinine<br>Ratioed<br>[ng/mL]     | Creatinine<br>Ratioed<br>[µg/g] | Non-Creatinine<br>Ratioed<br>[ng/mL] | Creatinine<br>Ratioed<br>[µg/g] |
| 5th        | [<LOD]                                     | 6.41 [5.97,6.85]                | [<LOD]                                     | 4.70 [2.91,6.48]                | [<LOD]                                   | 4.68 [3.78,5.59]                | [<LOD]                               | 4.57 [4.23,4.91]                |
| 10th       | [<LOD]                                     | 7.74 [7.29,8.20]                | [<LOD]                                     | 6.15 [4.33,7.97]                | [<LOD]                                   | 5.76 [4.96,6.56]                | [<LOD]                               | 5.38 [4.68,6.07]                |
| 25th       | [<LOD]                                     | 11.4 [10.8,12.0]                | [<LOD]                                     | 10.5 [8.55,12.4]                | [<LOD]                                   | 8.68 [7.54,9.83]                | [<LOD]                               | 8.36 [7.12,9.60]                |
| 50th       | 17.6 [16.4,18.8]                           | 18.9 [17.4,20.3]                | 13.1 [11.6,14.5]                           | 16.9 [12.7,21.2]                | 14.8 [13.5,16.1]                         | 13.4 [11.6,15.1]                | 15.9 [14.4,17.4]                     | 18.1 [15.6,20.5]                |
| 75th       | 32.2 [28.4,35.9]                           | 34.7 [32.4,37.0]                | 23.2 [11.3,35.1]                           | 31.9 [21.2,42.5]                | 27.7 [21.2,34.1]                         | 30.6 [24.7,36.4]                | 41.1 [28.8,53.4]                     | 38.0 [31.0,45.0]                |
| 90th       | 76.9 [60.5,93.3]                           | 69.9 [61.1,78.7]                | 66.2 [43.1,89.3]                           | 69.1 [44.7,93.6]                | 61.5 [38.7,84.2]                         | 79.6 [50.2,109]                 | 107 [79.4,135]                       | 119 [78.7,160]                  |
| 95th       | 130 [110,149]                              | 112 [94.7,130]                  | 137 [29.4,245]                             | 102 [23.0,181]                  | 163 [54.2,273]                           | 142 [51.2,232]                  | 188 [38.9,336]                       | 245 [124,366]                   |

[<LOD]: less than the limit of detection

Table S42. Sample-weighted multivariate regression modeling of predictor variables for urinary N-acetyl-S-(2-carboxyethyl)-L-cysteine (2COEMA). (N=4,983).

| <b>Predictor</b>       | <b>Level</b>           | <b>N</b> | <b>% (SE)</b> | <b>Coefficient [95% CI]</b> | <b>p-Value</b> |
|------------------------|------------------------|----------|---------------|-----------------------------|----------------|
| Intercept              |                        |          |               | 0.352 [0.0529, 0.651]       |                |
| Creatinine, urine (Ln) | Coefficient            |          |               | 0.890 [0.839, 0.942]        | <0.0001        |
| Sex                    | Male                   | 2448     | 42.9 (0.820)  | Ref.                        |                |
|                        | Female                 | 2535     | 57.1 (0.820)  | 0.0870 [7.77E-03, 0.166]    | 0.0317         |
| Age Group              | 18-24                  | 1307     | 14.5 (0.512)  | -0.186 [-0.282, -0.090]     | 0.0002         |
|                        | 25-34                  | 966      | 18.9 (0.978)  | Ref.                        |                |
|                        | 35-54                  | 1704     | 37.6 (1.32)   | 0.114 [3.67E-03, 0.225]     | 0.0430         |
|                        | ≥55                    | 1006     | 28.9 (1.00)   | 0.275 [0.169, 0.381]        | <0.0001        |
|                        | Non-Hispanic White     | 3052     | 60.8 (1.39)   | Ref.                        |                |
| Race/Ethnicity         | Non-Hispanic Black     | 841      | 14.8 (0.913)  | 9.60E-03 [-0.0746, 0.094]   | 0.8214         |
|                        | Hispanic               | 722      | 17.2 (1.04)   | -0.162 [-0.261, -0.063]     | 0.0016         |
|                        | Other Race/Multiracial | 368      | 7.21 (0.654)  | -0.0319 [-0.135, 0.071]     | 0.5399         |
|                        | <High School/GED       | 1323     | 20.3 (0.815)  | 0.0643 [-0.022, 0.151]      | 0.1432         |
| Education Level        | HS Diploma             | 1310     | 26.8 (1.23)   | Ref.                        |                |
|                        | <4y College/Associate  | 1766     | 29.7 (1.21)   | -0.0307 [-0.124, 0.062]     | 0.5131         |
|                        | Bachelors              | 584      | 23.3 (1.43)   | -0.0642 [-0.181, 0.053]     | 0.2785         |
|                        | Smokers                | 2998     | 29.3 (0.748)  | 1.12 [1.05, 1.18]           | <0.0001        |
| Tobacco User Group     | ENDS Users             | 138      | 0.994 (0.097) | 0.145 [9.15E-03, 0.280]     | 0.0367         |
|                        | Smokeless Users        | 337      | 2.48 (0.179)  | -5.31E-03 [-0.120, 0.109]   | 0.9270         |
|                        | Never Users            | 1510     | 67.3 (0.819)  | Ref.                        |                |

Table S43. Sample-weighted multivariate regression modeling of predictor variables for urinary N-acetyl-S-(2-cyanoethyl)-L-cysteine (2CYEMA). (N=5,245).

| <b>Predictor</b>       | <b>Level</b>           | <b>N</b> | <b>% (SE)</b> | <b>Coefficient [95% CI]</b> | <b>p-Value</b> |
|------------------------|------------------------|----------|---------------|-----------------------------|----------------|
| Intercept              |                        |          |               | -2.99 [-3.38, -2.59]        |                |
| Creatinine, urine (Ln) | Coefficient            |          |               | 0.726 [0.657, 0.794]        | <0.0001        |
| Sex                    | Male                   | 2578     | 43.2 (0.769)  | Ref.                        |                |
|                        | Female                 | 2667     | 56.8 (0.769)  | 1.99E-03 [-0.103, 0.107]    | 0.9702         |
| Age Group              | 18-24                  | 1358     | 14.2 (0.504)  | -0.167 [-0.339, 5.60E-03]   | 0.0578         |
|                        | 25-34                  | 1013     | 18.7 (0.984)  | Ref.                        |                |
|                        | 35-54                  | 1815     | 37.8 (1.29)   | 0.0325 [-0.0953, 0.160]     | 0.6153         |
|                        | ≥55                    | 1059     | 29.3 (1.07)   | 0.0367 [-0.123, 0.196]      | 0.6490         |
|                        | Non-Hispanic White     | 3226     | 61.3 (1.36)   | Ref.                        |                |
| Race/Ethnicity         | Non-Hispanic Black     | 873      | 14.5 (0.865)  | 0.0564 [-0.103, 0.215]      | 0.4830         |
|                        | Hispanic               | 760      | 17.1 (1.02)   | -0.147 [-0.319, 0.025]      | 0.0932         |
|                        | Other Race/Multiracial | 386      | 7.15 (0.647)  | 0.0286 [-0.155, 0.212]      | 0.7583         |
| Education Level        | <High School/GED       | 1395     | 20.3 (0.794)  | 0.0668 [-0.121, 0.255]      | 0.4827         |
|                        | HS Diploma             | 1375     | 27.3 (1.28)   | Ref.                        |                |
|                        | <4y College/Associate  | 1856     | 29.4 (1.16)   | -0.118 [-0.261, 0.025]      | 0.1035         |
|                        | Bachelors              | 619      | 23.0 (1.39)   | -0.184 [-0.348, -0.020]     | 0.0282         |
| Tobacco User Group     | Smokers                | 3180     | 29.7 (0.710)  | 4.82 [4.71, 4.93]           | <0.0001        |
|                        | ENDS Users             | 149      | 1.03 (0.093)  | 1.17 [0.928, 1.42]          | <0.0001        |
|                        | Smokeless Users        | 353      | 2.48 (0.182)  | 0.245 [0.0685, 0.421]       | <0.0001        |
|                        | Never Users            | 1563     | 66.8 (0.781)  | Ref.                        |                |

Table S44. Sample-weighted multivariate regression modeling of predictor variables for urinary N-acetyl-S-(3-hydroxypropyl)-L-cysteine (3HPMA). (N=5,199).

| Predictor              | Level                  | N    | % (SE)       | Coefficient [95% CI]      | p-Value |
|------------------------|------------------------|------|--------------|---------------------------|---------|
| Intercept              |                        |      |              | 1.94 [1.61, 2.27]         |         |
| Creatinine, urine (Ln) | Coefficient            |      |              | 0.789 [0.726, 0.851]      | <0.0001 |
| Sex                    | Male                   | 2549 | 43.1 (0.766) | Ref.                      |         |
|                        | Female                 | 2650 | 56.9 (0.766) | 0.0334 [-0.041, 0.107]    | 0.3734  |
| Age Group              | 18-24                  | 1352 | 14.3 (0.504) | -0.191 [-0.296, -0.087]   | 0.0004  |
|                        | 25-34                  | 1001 | 18.7 (0.988) | Ref.                      |         |
|                        | 35-54                  | 1791 | 37.7 (1.29)  | 0.147 [0.025, 0.268]      | 0.0185  |
|                        | ≥55                    | 1055 | 29.4 (1.07)  | 0.159 [0.068, 0.250]      | 0.0008  |
|                        | Non-Hispanic White     | 3189 | 61.2 (1.37)  | Ref.                      |         |
| Race/Ethnicity         | Non-Hispanic Black     | 871  | 14.5 (0.869) | -0.295 [-0.408, -0.182]   | <0.0001 |
|                        | Hispanic               | 756  | 17.1 (1.03)  | -0.0964 [-0.224, 0.031]   | 0.1376  |
|                        | Other Race/Multiracial | 383  | 7.16 (0.650) | 0.253 [0.078, 0.428]      | 0.0050  |
| Education Level        | <High School/GED       | 1382 | 20.3 (0.799) | 8.42E-03 [-0.0988, 0.116] | 0.8766  |
|                        | HS Diploma             | 1364 | 27.3 (1.29)  | Ref.                      |         |
|                        | <4y College/Associate  | 1837 | 29.3 (1.16)  | -0.0622 [-0.173, 0.048]   | 0.2662  |
|                        | Bachelors              | 616  | 23.0 (1.39)  | -0.0926 [-0.231, 0.046]   | 0.1868  |
| Tobacco User Group     | Smokers                | 3143 | 29.5 (0.694) | 1.58 [1.51, 1.66]         | <0.0001 |
|                        | ENDS Users             | 147  | 1.01 (0.098) | 0.221 [0.0748, 0.366]     | 0.0034  |
|                        | Smokeless Users        | 346  | 2.45 (0.179) | -0.115 [-0.217, -0.0127]  | 0.0280  |
|                        | Never Users            | 1563 | 67.0 (0.769) | Ref.                      |         |

Table S45. Sample-weighted multivariate regression modeling of predictor variables for urinary N-acetyl-S-(3-hydroxypropyl-1-methyl)-L-cysteine (3HMPMA). (N=5,245).

| <b>Predictor</b>       | <b>Level</b>           | <b>N</b> | <b>% (SE)</b> | <b>Coefficient [95% CI]</b> | <b>p-Value</b> |
|------------------------|------------------------|----------|---------------|-----------------------------|----------------|
| Intercept              |                        |          |               | 2.11 [1.82, 2.40]           |                |
| Creatinine, urine (Ln) | Coefficient            |          |               | 0.842 [0.788, 0.896]        | <.0001         |
| Sex                    | Male                   | 2578     | 43.2 (0.769)  | Ref.                        |                |
|                        | Female                 | 2667     | 56.8 (0.769)  | 0.121 [0.036, 0.207]        | 0.0060         |
| Age Group              | 18-24                  | 1358     | 14.2 (0.504)  | -0.218 [-0.301, -0.134]     | <0.0001        |
|                        | 25-34                  | 1013     | 18.7 (0.984)  | Ref.                        |                |
|                        | 35-54                  | 1815     | 37.8 (1.29)   | 0.157 [0.059, 0.256]        | 0.0020         |
|                        | ≥55                    | 1059     | 29.3 (1.07)   | 0.304 [0.212, 0.396]        | <0.0001        |
|                        | Non-Hispanic White     | 3226     | 61.3 (1.36)   | Ref.                        |                |
| Race/Ethnicity         | Non-Hispanic Black     | 873      | 14.5 (0.865)  | -0.327 [-0.425, -0.230]     | <0.0001        |
|                        | Hispanic               | 760      | 17.1 (1.02)   | -0.196 [-0.326, -0.066]     | 0.0035         |
|                        | Other Race/Multiracial | 386      | 7.15 (0.647)  | -0.0465 [-0.225, 0.132]     | 0.6054         |
| Education Level        | <High School/GED       | 1395     | 20.3 (0.794)  | 0.0874 [-0.036, 0.211]      | 0.1636         |
|                        | HS Diploma             | 1375     | 27.3 (1.28)   | Ref.                        |                |
|                        | <4y College/Associate  | 1856     | 29.4 (1.16)   | -0.0156 [-0.121, 0.090]     | 0.7701         |
|                        | Bachelors              | 619      | 23.0 (1.39)   | 0.0240 [-0.103, 0.151]      | 0.7084         |
| Tobacco User Group     | Smokers                | 3180     | 29.7 (0.710)  | 1.80 [1.73, 1.88]           | <0.0001        |
|                        | ENDS Users             | 149      | 1.03 (0.093)  | -0.106 [-0.276, 0.0636]     | 0.2181         |
|                        | Smokeless Users        | 353      | 2.48 (0.182)  | -0.0454 [-0.144, 0.0532]    | 0.3631         |
|                        | Never Users            | 1563     | 66.8 (0.781)  | Ref.                        |                |

Table S46. Sample-weighted multivariate regression modeling of predictor variables for urinary N-acetyl-S-(4-hydroxy-2-methyl-2-buten-1-yl)-L-cysteine (4HMBEMA). (N=5,221).

| <b>Predictor</b>       | <b>Level</b>           | <b>N</b> | <b>% (SE)</b> | <b>Coefficient [95% CI]</b> | <b>p-Value</b> |
|------------------------|------------------------|----------|---------------|-----------------------------|----------------|
| Intercept              |                        |          |               | -3.40 [-3.72, -3.08]        |                |
| Creatinine, urine (Ln) | Coefficient            |          |               | 0.962 [0.905, 1.02]         | <0.0001        |
| Sex                    | Male                   | 2562     | 43.2 (0.764)  | Ref.                        |                |
|                        | Female                 | 2659     | 56.8 (0.764)  | 0.208 [0.116, 0.299]        | <0.0001        |
| Age Group              | 18-24                  | 1347     | 14.2 (0.515)  | -0.268 [-0.424, -0.112]     | 0.0009         |
|                        | 25-34                  | 1008     | 18.7 (0.975)  | Ref.                        |                |
|                        | 35-54                  | 1809     | 37.8 (1.30)   | 0.122 [-0.020, 0.265]       | 0.0908         |
|                        | ≥55                    | 1057     | 29.4 (1.07)   | 0.286 [0.143, 0.430]        | 0.0001         |
|                        |                        |          |               |                             |                |
| Race/Ethnicity         | Non-Hispanic White     | 3212     | 61.4 (1.34)   | Ref.                        |                |
|                        | Non-Hispanic Black     | 870      | 14.5 (0.871)  | -0.332 [-0.447, -0.216]     | <0.0001        |
|                        | Hispanic               | 756      | 17.1 (1.02)   | -0.294 [-0.417, -0.171]     | <0.0001        |
|                        | Other Race/Multiracial | 383      | 7.02 (0.642)  | -0.112 [-0.307, 0.083]      | 0.2564         |
| Education Level        | <High School/GED       | 1390     | 20.3 (0.793)  | 0.0855 [-0.051, 0.222]      | 0.2181         |
|                        | HS Diploma             | 1368     | 27.3 (1.29)   | Ref.                        |                |
|                        | <4y College/Associate  | 1846     | 29.3 (1.16)   | 0.0424 [-0.079, 0.164]      | 0.4890         |
|                        | Bachelors              | 617      | 23.0 (1.40)   | 0.0442 [-0.097, 0.185]      | 0.5353         |
| Tobacco User Group     | Smokers                | 3176     | 29.9 (0.714)  | 2.56 [2.47, 2.64]           | <0.0001        |
|                        | ENDS Users             | 148      | 1.02 (0.095)  | 0.0197 [-0.158, 0.197]      | 0.8264         |
|                        | Smokeless Users        | 348      | 2.47 (0.181)  | 0.0425 [-0.0969, 0.182]     | 0.5468         |
|                        | Never Users            | 1549     | 66.7 (0.784)  | Ref.                        |                |

Table S47. Sample-weighted multivariate regression modeling of predictor variables for urinary N-acetyl-S-(4-hydroxy-2-buten-1-yl)-L-cysteine (t4HBEMA). (N=5,244).

| <b>Predictor</b>       | <b>Level</b>           | <b>N</b> | <b>% (SE)</b> | <b>Coefficient [95% CI]</b> | <b>p-Value</b> |
|------------------------|------------------------|----------|---------------|-----------------------------|----------------|
| Intercept              |                        |          |               | -2.48 [-2.72, -2.23]        |                |
| Creatinine, urine (Ln) | Coefficient            |          |               | 0.851 [0.808, 0.894]        | <0.0001        |
| Sex                    | Male                   | 2577     | 43.2 (0.769)  | Ref.                        |                |
|                        | Female                 | 2667     | 56.8 (0.769)  | 0.0933 [0.032, 0.155]       | 0.0033         |
| Age Group              | 18-24                  | 1358     | 14.2 (0.504)  | -0.200 [-0.300, -0.101]     | 0.0001         |
|                        | 25-34                  | 1013     | 18.7 (0.985)  | Ref.                        |                |
|                        | 35-54                  | 1814     | 37.8 (1.29)   | 0.105 [0.014, 0.196]        | 0.0234         |
|                        | ≥55                    | 1059     | 29.3 (1.07)   | 0.250 [0.154, 0.347]        | <0.0001        |
|                        |                        |          |               |                             |                |
| Race/Ethnicity         | Non-Hispanic White     | 3226     | 61.3 (1.36)   | Ref.                        |                |
|                        | Non-Hispanic Black     | 873      | 14.5 (0.865)  | -0.234 [-0.334, -0.134]     | <0.0001        |
|                        | Hispanic               | 759      | 17.1 (1.02)   | -0.185 [-0.280, -0.089]     | 0.0002         |
|                        | Other Race/Multiracial | 386      | 7.15 (0.647)  | -0.0375 [-0.184, 0.109]     | 0.6125         |
| Education Level        | <High School/GED       | 1395     | 20.3 (0.794)  | 0.0254 [-0.072, 0.122]      | 0.6041         |
|                        | HS Diploma             | 1374     | 27.3 (1.28)   | Ref.                        |                |
|                        | <4y College/Associate  | 1856     | 29.4 (1.16)   | -0.0186 [-0.111, 0.074]     | 0.6906         |
|                        | Bachelors              | 619      | 23.0 (1.39)   | -0.0362 [-0.147, 0.074]     | 0.5171         |
| Tobacco User Group     | Smokers                | 3180     | 29.7 (0.709)  | 1.97 [1.90, 2.03]           | <0.0001        |
|                        | ENDS Users             | 149      | 1.03 (0.093)  | -0.0493 [-0.170, 0.0710]    | 0.4184         |
|                        | Smokeless Users        | 352      | 2.48 (0.182)  | -0.0571 [-0.156, 0.0419]    | 0.2553         |
|                        | Never Users            | 1563     | 66.8 (0.781)  | Ref.                        |                |
